# The abundances and occurrences of foliar microbes are poorly predicted by variation in plant traits and abiotic conditions

Joshua G. Harrison<sup>1</sup>, C. Alex Buerkle<sup>1</sup>

<sup>1</sup>Department of Botany, University of Wyoming, Laramie, WY 82071, USA

*Corresponding author:* Joshua G. Harrison  
1000 E. University Ave.  
Department of Botany, 3165  
University of Wyoming  
Laramie, WY 82071, USA  
joshua.harrison@uwyo.edu  
Fax: 307-766-2851

*Keywords:* endophytes, plant traits, epiphytes, phyllosphere, foliar, microbial ecology

*Running title:* Phyllosphere prediction

## Abstract

Much effort has been made to understand why foliar microbes live where they do. However, whether foliar microbiome composition can be predicted is unknown. Here, we determine the limits of prediction using metabarcoding data of both fungal and bacterial assemblages that occur within (endophytes) and without (epiphytes) leaves from 59 plant taxa. We built random forest models for prevalent taxa and quantified the combined predictive power of 24 plant traits, 12 abiotic conditions and 7 additional features. As response variables, we considered microbial relative and absolute abundances, and occurrences. Most microbial taxa were too rare to effectively model, but model performance was generally poor even for the most prevalent and abundant taxa (model  $R^2$  was typically  $<0.1$ ). Fungi were more tractable for modeling than bacteria. Models of Shannon's diversity were moderately successful but those for richness were not. Taxa responded idiosyncratically and non-linearly to variation in the foliar habitat. When prevalent microbes were included as features in models, performance improved. Our results suggest that easily measurable aspects of the phyllosphere habitat are poor predictors of microbiome composition. These results pose a challenge for the study of microbial biogeography and we discuss possible ways forward.

## 1 Introduction

2 There is an astonishingly diverse array of microbiota living inside of leaves (henceforth  
3 endophytes) and on the surface of leaves (epiphytes; Arnold and Lutzoni 2007; Griffin et  
4 al. 2016; Lodge et al. 1996). Over the past decade, interest in these microbes has grown  
5 tremendously (Harrison and Griffin 2020), as motivated by the effects of endophytes on host  
6 plant traits, which can be quite dramatic (Doty 2011; Friesen et al. 2011) and likely scale up  
7 to influence entire ecosystems (Laforest-Lapointe et al. 2016).

8 A primary thrust of research has been to characterize the compositions of foliar micro-  
9 biomes across various gradients—both biotic and abiotic—in an effort to determine drivers  
10 of community assembly and describe biogeographic patterns. Indeed, well over a thousand  
11 papers have linked variation in foliar microbiomes to a bewildering array of habitat char-  
12 acteristics, including rainfall (Lau et al. 2013), temperature (Oita et al. 2021), host taxon  
13 (Vincent et al. 2015), floral ‘neighborhood’ (Lajoie and Kembel 2021), the abundances of  
14 other microbes (Agler et al. 2016), insect herbivore activity (Humphrey and Whiteman 2020),  
15 the proximity of hosts to cities (Laforest-Lapointe et al. 2017), and even hail (Fernandes et al.  
16 2011). These are but a smattering of examples—the list of interesting habitat-microbiome  
17 associations could fill the rest of this manuscript.

18 Most of these studies relied on composite response variables, meaning the response was  
19 neither the abundances nor occurrences of specific microbial taxa, but rather assemblage-wide  
20 richness, diversity, or estimates of divergence among samples (i.e., ordination-based analyses).  
21 Moreover, by logistical necessity, all studies have considered only a small subset of the  
22 numerous dimensions that together compose the foliar habitat. This has precluded accurate  
23 accounting of the relative importance of various plant traits and abiotic conditions for most  
24 foliar taxa. Indeed, whether or not the abundances of most taxa can be predicted by a

25 consistent subset of habitat characteristics is unknown. A possible next step is to exhaustively  
26 characterize foliar habitat variation across host plant taxa growing in different conditions  
27 and to link habitat characteristics to the abundances of particular microbial taxa.

28 *Why the focus on prediction?*

29 Predictive modeling of population dynamics has long-been a driving focus of applied pop-  
30 ulation ecology, but community and microbial ecologists have tended to focus on pattern  
31 description (e.g., in species richness or diversity) and on ranking the importance of various  
32 processes—for example, those that mediate community assembly (Vellend 2010). Understand-  
33 ing process is akin to prediction, but not quite the same. Even if the relative importance  
34 of processes behind community assembly are understood, there may be stochastic forces  
35 at work that have largely unpredictable outcomes or chaotic, deterministic forces that are  
36 unpredictable without knowledge of antecedent conditions (May 2019). A further challenge  
37 is that various ecological forces may leave indistinguishable imprints in natural communities,  
38 precluding accurate quantification of process outside of a manipulative context. This suggests  
39 that accurate prediction is likely harder than accurately understanding process—a daunting  
40 prospect indeed.

41 A countering argument could be made that assessing the relative importance and contribu-  
42 tions of confounded processes may be impossible, but prediction of various, useful attributes  
43 of ecological communities could be within reach. Indeed, at the macro-ecological scale this  
44 has proven true as many patterns can be reliably observed and thus predicted, but the  
45 relative importance of the myriad processes underlying them often remain obscure—the  
46 latitudinal gradient in species richness is a good example (Mittelbach et al. 2007; Pianka  
47 1966). Similarly, patterns in assemblage diversity, richness, and perhaps even the relative  
48 abundances of specific taxa could be predictable by various measurable phenomena, be they  
49 causal or merely correlated. Indeed, the literature is built upon studies that explain some  
50 variation in community composition in this way (see the examples cited above), though the  
51 variance explained in response variables often is quite low. Under the predictive paradigm, the  
52 question becomes: what are the limits of predictive modeling, how can models be optimized,  
53 and what biology can be learned? We do not mean to suggest that prediction and the  
54 interrogation of process are necessarily at odds. Indeed, once the limits of prediction are  
55 known a better accounting of underlying process may be possible.

56 To illustrate the possible benefits of the predictive paradigm, consider two possibilities for  
57 the analyses presented here. It may be that through an comprehensive measurement of plant  
58 traits and abiotic characteristics we can account for a large proportion of the variation in the  
59 abundances of many microbial taxa—say 50% or more of the variation in the abundance of  
60 the 500 most common microbes (while acknowledging the vagueness of the word ‘common’).  
61 In this case, while parsing deterministic and stochastic forces may still be challenging, it  
62 suggests there is a firm basis for applied research and for future experimentation to discover  
63 causal mechanisms. On the other hand, if it is not possible to predict more than a few  
64 percent of the variation in abundances of common microbes then either the hypothesized  
65 deterministic forces that were measured are neither causal nor covary with causal phenomena  
66 or that stochastic and chaotic forces drive the observed variation. This situation would also

67 suggest possible ways forward, through measuring different habitat dimensions that could be  
68 causal, or by developing better measurement tools, experiments, or theory to determine rates  
69 of stochastic community divergence.

### 70 *Modeling microbiota: tools and challenges*

71 Most studies linking foliar microbiota to habitat conditions rely on linear modeling or some  
72 analysis of the variation within a distance (or dissimilarity) matrix made from taxon counts  
73 within samples (Bowman and Arnold 2021; Gomes et al. 2018; González-Teuber et al. 2020;  
74 Kembel et al. 2014; Kembel and Mueller 2014; Oita et al. 2021; Vincent et al. 2015). Linear  
75 modeling has many benefits, including intuitive interpretation of model coefficients and  
76 a resistance to overfitting. However, it may not perform well when predicting non-linear  
77 phenomena. Analyzing variation within distance matrices, typically via some combination  
78 of PERMANOVA and ordination, also has benefits, including the ease with which intuitive  
79 visualizations can be made of model results. But this approach is limited because it relies on  
80 describing differences in centroids of points that lie in a space with few dimensions (usually  
81 two or three). Thus, covariances among many thousands of organisms are decomposed into a  
82 few dimensions (i.e., eigenvectors) that may only explain a small percentage of the overall  
83 variation within the matrix and then those dimensions linked to habitat variation (sometimes  
84 qualitatively, via visual inspection of ordination plots). This technique provides an estimate  
85 of ‘community structure’ (i.e. patterns of among-sample similarity in assemblage composition)  
86 but provides no taxon-specific insights. Moreover, decisions must be made regarding the  
87 choice of matrix decomposition, which determines the relative weight of rare and abundant  
88 taxa on the analysis and that shapes inferences (Legendre and Gallagher 2001).

89 In comparison, machine learning methods, as a broadly-defined suite of approaches,  
90 include many algorithms that are optimized for prediction, can readily handle non-linear  
91 relationships, and that do not necessarily rely on distributional assumptions. As such, the  
92 application of machine learning methods to foliar microbiome data should provide novel  
93 insights. Here, we use the random forest algorithm because it has interpretable outputs (i.e.,  
94 the ranking of feature importance), is easy to implement, and provides very strong predictive  
95 performance (Breiman 2001; Cutler et al. 2007). Random forests are a collection of decision  
96 trees that split the observations (e.g., taxon abundances) into sets according to values of  
97 covariates that are each made using a subset of the available data and covariates (henceforth  
98 referred to as features, as is typical within the machine learning literature). The entire  
99 ensemble of trees constitutes the forest and prediction is accomplished through aggregating  
100 and averaging the individual outputs of each tree. Feature importance is typically determined  
101 via a post-hoc perturbation test, where a feature is permuted, the model retrained, and the  
102 change in performance recorded.

103 Regardless of the analytical approach employed, microbiomes present two hurdles that  
104 complicate predictive modeling. First, most microbes are rare, meaning they may be  
105 represented by only a few sequence reads within several samples. Since rare taxa are so  
106 infrequently observed it is typically impossible to model their relationship with covariates—  
107 unless, the unlikely scenario occurs of a rare taxon being associated with some similarly  
108 unusual, but measurable, aspect of the foliar habitat and a large enough sample size has been



109 obtained such that the associated phenomenon can be observed multiple times. Second, it is  
110 harder to accurately count microbial taxa than it is to count macroscopic organisms. To be  
111 counted, microbial taxa have to be cultured and colony-forming units tallied, a valuable but  
112 often logistically challenging endeavor (Carini 2019); or viewed within a sample via microscopy  
113 or flow cytometry, tools that have not yet been used at scale to ask questions pertaining to  
114 microbial biogeography; or characterized via sequencing of DNA. For the latter approach,  
115 the sequences of marker loci that vary among taxa are characterized. Different sequences are  
116 assigned to different taxa and referred to as operational taxonomic units (OTUs). The number  
117 of counts output by the sequencing machine for a particular sequence describes that taxon’s  
118 relative abundance within the sample. While this approach to characterizing microbiomes is  
119 appealingly cost and time-effective, various laboratory biases must be considered (Nilsson  
120 et al. 2018) and, even when all is well in the lab, the resulting data suffer from the limitation  
121 that they describe only relative abundances. That is, sequence count data are compositional  
122 in nature. Compositional data are interdependent, as sequence counts for one taxon increases  
123 those for another taxon must decrease (Jackson 1997; Tsilimigras and Fodor 2016). This  
124 limitation is imposed by the instrumentation because sequencing machines output a finite  
125 number of reads.

126 To circumvent this challenge, internal standards (ISDs) can be added to samples prior to  
127 sequencing. Since the amount of ISD is standardized among samples, division of sequence  
128 count data by the ISD places the data on the same scale, which is proportional to abundance  
129 (henceforth referred to as “absolute” abundance; Turlousse et al. 2017). The benefits of  
130 ISDs can be undercut (as reviewed by Harrison et al. 2021c), but their use can lead to novel  
131 inference.

### 132 *The limits of prediction for foliar microbiota*

133 Here, we determine to what extent the abundances and occurrences of foliar taxa are  
134 predictable and identify the most influential characteristics of the foliar habitat for fungal  
135 (ITS) and bacterial (16s) endophytes and epiphytes. We sequenced DNA from 1241 individual  
136 plants collected from the mountain ranges of Wyoming, U.S.A. (Fig. 1). When building  
137 models, we considered 24 plant traits, 12 abiotic site characteristics (e.g., rainfall, elevation,  
138 etc.), aspects of the vegetation matrix surrounding the site, and those metrics pertinent  
139 to sampling, such as the mass of sampled leaves (Table 1). We ask to what extent model  
140 performance is shaped by the choice of dataset: either relative or absolute abundance of taxa  
141 or presence and absence data for occurrence. Finally, we measured the limits of prediction  
142 for common derived variables, including Shannon’s diversity and richness.

## 143 **Methods**

### 144 *Sampling details*

145 Sampling took place during the summer of 2018 in six mountain ranges in Wyoming, U.S.A.  
146 (Fig. 1). Within each locality 2–3 50m by 50m plots were selected. At each locality, plots were

147 selected in the alpine, sub-alpine, and lower sub-alpine/montane forest. The elevation range  
148 of sampling locations spanned 2120–3419m. A total of twenty plots were sampled. A total  
149 of 59 plant species were sampled. We attempted to collect 10 individuals from each plant  
150 species at each site. We obtained leaves or leaflets from 1241 plants. For details regarding  
151 field protocols, including how plant traits were measured, see the Supplemental Material.

### 152 *Sample preparation, sequencing, and bioinformatics*

153 To separate endophytes from epiphytes, leaves were placed in tubes and agitated in a solution  
154 of 1×PBS, pure water, and 0.15% Tween 20 for 20 minutes and then sonicated for 5 min.  
155 The solution was decanted, centrifuged, and lyophilized and constituted our epiphyte (EP)  
156 samples (see the Supplemental Material). Washed leaves were lyophilized and ground in a  
157 mixer mill.

158 DNA was extracted using Qiagen DNEasy plant kits. Library preparation followed the  
159 two-step PCR procedure described in Harrison et al. (2021a). To amplify the ITS region, the  
160 ITS1f-ITS2 primer pair was used and for the 16S locus the 505-806 pair was used (Wang  
161 and Qian 2009; White et al. 1990). We added an equimolar amount of a synthetic DNA  
162 internal standard (ISD) to each sample prior to PCR (Tourlousse et al. 2017). Negative  
163 controls, including for cross-contamination, and positive controls were employed during library  
164 preparation and sequencing. Psomagen, Inc. (Rockville, MD, USA) performed paired-end  
165 2×250 sequencing using an Illumina NovaSeq machine.

166 For details of bioinformatics see the Supplemental Material. In brief, exact sequence  
167 variants (ESVs) were determined and clustered by 97% similarity into OTUs. Taxonomic  
168 hypotheses for OTUs were generated using the SINTAX algorithm (Edgar 2016) and the  
169 UNITE (for ITS; v7.2; Community 2017) and Greengenes (for 16S; v13.5; DeSantis et al.  
170 2006) databases.

171 Prior to modeling, count data were either Hellinger standardized (for relative abundance  
172 datasets) or normalized using the internal standard, thus putting all taxa on an equivalent  
173 scale and avoiding many of the challenges posed by compositionality (Harrison et al. 2021c).  
174 For ordinations and cluster analyses, data were Hellinger standardized and the Euclidean  
175 distance was calculated (Legendre and Gallagher 2001). Richness was estimated using the  
176 **breakaway** R package (Willis and Bunge 2015), which uses non-linear regression of the ratios  
177 of taxon frequencies to estimate richness within samples.

### 178 *Predictive modeling approach*

179 To determine the predictability of microbial abundances we used random forest models  
180 implemented using the **ranger** R package (v 0.13.1 Wright and Ziegler 2017). We modeled  
181 four sets of response variables. First, we modeled the absolute and relative abundances of  
182 prevalent microbial taxa, which were those that occurred in 100 or more individual plants  
183 (about 10% of samples). 172 fungal and 26 bacterial OTUs met this prevalence threshold.  
184 Second, we repeated this analysis using qualitative data for occupancy. Third, we asked if  
185 predictive ability shifted when examining the microbiome of a single host, again we used

186 absolute and relative abundances and occupancy data. Fourth, we modeled Shannon's  
187 diversity and estimated richness for both fungi and bacteria.

188 We used a rigorous approach to model fitting, tuning, and performance determination  
189 that was reliant upon the `mlr3` R package (v 0.12.0; Lang et al. 2019).

190 Models of ISD transformed abundances were repeated while including the abundances  
191 of other prevalent microbes as features. These microbes were the same as those chosen for  
192 modeling (see above) and thus represented the most abundant and prevalent taxa. For models  
193 of bacteria, only co-occurring bacteria were used as features and the same was true for fungal  
194 models. The purpose of this analysis was to determine if microbial abundances could be  
195 predicted by the abundances of co-occurring taxa. We conducted this analysis using ISD  
196 transformed data only to avoid spurious results due to compositionality.

## 197 Results

### 198 *Biodiversity and general sequencing results*

199 After filtering reads, removing non-target taxa (e.g., the host plant), and removing quality  
200 control sequences, we retained 12,795,691 ITS reads and 5,733,638 16s microbial reads for  
201 analysis (notably we obtained ~13 million additional plant reads from our 16S data that were  
202 discarded; Fig. S6). ESVs among these reads were identified and clustered (97% similarity  
203 threshold) into 3189 fungal OTUs and 2360 bacterial OTUs.

204 Most microbial taxa were observed in few plant hosts and were low abundance. Only 172  
205 fungal taxa and 23 bacterial taxa were present in more than 100 of the individual plants we  
206 sampled (out of 1241 total plants). More abundant taxa tended to also be more prevalent  
207 for both bacteria (Pearson's correlation of median abundance and prevalence,  $r = 0.49$ ,  $p <$   
208  $0.001$ ) and fungi ( $r = 0.49$ ,  $p < 0.001$ ). The strength of this correlation increased when only  
209 considering those taxa that occurred in 100 or more samples (fungi:  $r = 0.5$ ; bacteria:  $r =$   
210  $0.76$ ,  $p < 0.001$  in both cases).

211 Fungi tended to be more abundant inside rather than outside of leaves, but the opposite  
212 was true for bacteria (Fig. 2). Many microbial taxa occurred as both epiphytes and endophytes;  
213 indeed, all fungi that occurred as epiphytes occurred as endophytes (Fig. 3d). However, there  
214 were many more microbial taxa that were observed solely in epiphyte samples, suggesting  
215 that our leaf washing protocol to capture epiphytes was successful. The leaf barrier seemed  
216 to shape bacterial assemblages more than it did for fungi as we observed greater correlation  
217 in microbiomes between plant compartments (EP versus EN) for the latter (Mantel test of  
218 Hellinger transformed distance matrices; for bacteria:  $r = 0.11$ ,  $p < 0.01$  and for fungi:  $r =$   
219  $0.36$ ,  $p < 0.01$ ).

220 Ascomycota was by far the most abundant fungal phylum observed (Fig. 2) and Doth-  
221 ideomycetes the most abundant class. Proteobacteria and Actinobacteria were typically the  
222 most abundant bacterial phyla present, but there was more among-host heterogeneity in the  
223 abundances of bacterial phyla than for fungal phyla. For instance, Tenericutes were orders of  
224 magnitude more abundant in *Primula parryi* than in other plant taxa (Fig. 2). Hosts that

225 were similar in terms of their fungal associates had similar bacterial assemblages, albeit the  
226 correlation was moderate (EN:  $r = 0.16$ ,  $p < 0.01$ ; EP:  $r = 0.18$ ,  $p < 0.01$ ). Patterns of host  
227 generalization shifted depending on microbial taxon and the plant compartment considered.  
228 For instance, for fungi, a similar degree of host generalization was observed for endophytes  
229 and epiphytes, but, in contrast, bacterial epiphytes were more generalized than bacterial  
230 endophytes (Fig. S7).

231 Ordinations and associated PERMANOVA analyses suggested greater divergence among  
232 samples in fungal assemblages compared to bacterial assemblages (Figs.S8– S11) and that  
233 the two groups of microbes responded to different dimensions of the phyllosphere habitat.  
234 Specifically, fungal samples weakly clustered by plant compartment (PERMANOVA;  $R^2 =$   
235  $0.01$ ,  $p < 0.01$ ) and host life history ( $R^2 = 0.02$ ,  $p < 0.01$ ), and more strongly clustered by  
236 nominal taxon ( $R^2 = 0.17$ ,  $p < 0.01$ ). In comparison, plant compartment influenced bacteria  
237 much more than fungi ( $R^2 = 0.13$ ,  $p < 0.01$ ) as did host taxon ( $R^2 = 0.30$ ,  $p < 0.01$ ), but  
238 host life history was a poor predictor of assemblage dissimilarity ( $R^2 = 0.03$ ,  $p < 0.01$ ). The  
239 homogeneity of variances assumption of PERMANOVA was violated for these analyses, which  
240 can lead to less accurate p value determination.

241 *At the landscape level, most foliar microbial taxa have unpredictable abundances and*  
242 *occurrences*

243 We attempted to predict the abundance and occurrence of microbial taxa that occurred  
244 within the leaves of Wyoming plants as a function of plant traits and abiotic conditions.  
245 We considered samples from 59 plant taxa growing at 20 sites spanning the mountains of  
246 Wyoming. During modeling, we considered microbial taxa that were present in ~10% or more  
247 of our samples; very rare taxa were not considered because they were not observed enough to  
248 build informative models. Focal taxa were generalists, often occurring in 40 or more hosts  
249 (Fig. S7).

250 We used the random forest algorithm for predictive modeling and measured model  
251 performance using a nested resampling procedure. Models were deemed successful if they  
252 had an  $R^2$  of greater than 1%. Using this generous threshold, we could predict the absolute  
253 abundances of 57 fungal taxa (out of 172) and 4 bacterial taxa (out of 25). The median  $R^2$   
254 for both fungi and bacteria was 0%. To check that these poor results were not due to model  
255 misspecification, data that were predictive of the response were simulated and included in a  
256 test model. Addition of simulated data dramatically increased  $R^2$ , as expected.

257 When the abundances of co-occurring microbial taxa were included in models as features,  
258 model performance improved, with 114 fungal models and 18 bacterial models having positive  
259  $R^2$  values. The median improvement in  $R^2$  for models that included other microbes as  
260 features was 0.07 for fungi and 0.08 for bacteria.

261 Relative abundances of fungi (Hellinger standardized count data) were easier to predict  
262 and models output  $R^2 \geq 0.01$  for 155 taxa (the median  $R^2$  was 0.11 and the maximum  
263 was 0.40). But bacterial relative abundances were no easier to predict than their absolute  
264 abundances—only 12 taxa were predictable (median  $R^2 = 0.03$ ,  $\max = 0.21$ ). More abundant  
265 taxa were easier to predict, as expected;  $R^2$  was positively correlated with the relative

266 abundance of fungi ( $r = 0.24$ ,  $p < 0.01$ ) but not significantly for bacteria ( $r = 0.32$ ,  $p = 0.33$ ;  
267 Fig. S12). Surprisingly,  $R^2$  was weakly negatively correlated with absolute abundances for  
268 both bacteria and fungi (Fig. S13).

269 Microbial presence within a sample (occupancy) was not easier to predict than abundance.  
270 To measure the performance of occupancy models, we used the Matthew's correlation  
271 coefficient (MCC; Matthews 1975). The MCC takes into account true and false positives and  
272 negatives, deals well with imbalanced data, and ranges from negative one to one. Values of  
273 zero denote a model that performs no better than a guess. The median MCC for bacteria  
274 was zero and for fungi was 0.02. MCC for fungi was over 0.2 for 39 fungi and 1 bacterial  
275 taxon (an MCC of 0.2 represents modest predictive performance). Models typically did well  
276 when predicting absences, which was expected given that most microbes were infrequently  
277 observed. Prediction of presences was much more challenging—the median percentage of  
278 correctly predicted occurrences was 0% for bacteria and 2% for fungi. MCC was correlated  
279 with prevalence for both bacteria ( $R = 0.44$ ,  $p = 0.03$ ; Fig. S14) and fungi ( $R = 0.29$ ,  $p <$   
280  $0.001$ ).

281 For those fungal taxa that had model  $R^2$  of  $\geq 1\%$  or an MCC  $\geq 0.2$  we examined which  
282 model features (predictor variables) were the most important. To do this, we counted the  
283 number of times a feature was in the top 10 most important for 20% or more of models  
284 (Fig. 3, S15). Feature importance was determined via permuting each feature, rerunning the  
285 model, and calculating the decline in  $R^2$  or MCC. We did not consider models for bacterial  
286 taxa, due to their poor performance. The importance of specific features differed among  
287 taxonomic groups and data sets. For instance, the relative abundances of fungi tended to  
288 be influenced more by sampling height, elevation, leaf area, leaf density (SLA), and date  
289 and less by aspects of leaf productivity, such as linear electron flow and F<sub>s</sub>, than were fungal  
290 absolute abundances and occupancy (Tables S2, S1, S3). There was no obvious pattern of  
291 the relative importance of abiotic versus biotic variables. Instead, most of the features we  
292 considered were identified as important for at least some taxa and not a single feature was in  
293 the top 10 most important for all successful models.

294 Despite these idiosyncrasies, we uncovered similarities among the best models for As-  
295 comycetes (12 models of relative abundances that all had  $R^2 > 0.25$ ). For all of these models,  
296 elevation and shrub richness were important (Table S4), and sampling date, temperature,  
297 and latitude were often so. Even among these top models, when considering features that  
298 were often important, the relationship between feature variation and relative abundance  
299 shifted among taxa (Fig. S16). For instance, some taxa responded sharply negatively to  
300 increased shrub richness initially and then leveled off as shrub richness increased, others did  
301 not respond much at all to changes in shrub richness, and still other taxa were positively  
302 associated with increased shrub richness. Similar patterns were observed for other important  
303 features and non-linear relationships between features and response variables were common.

304 Because host taxa were included as one-hot encoded features in our model, their aggregate  
305 importance was not represented via the post-hoc perturbation approach we used to estimate  
306 feature importance. Therefore, modeling was repeated without host taxon and the decline in  
307 performance recorded. For absolute abundance models of fungi,  $R^2$  declined from 0.01-0.09  
308 with an median decline of 0.01. Models for twenty fungal taxa had  $R^2$  values that dropped  
309 below 0.01 when host nominal taxon was removed. This pattern was mirrored for relative



310 abundance data. For bacteria, the median and mean  $R^2$  was unaffected by the inclusion of  
311 nominal taxon in models.

312 When absolute abundance models included the abundances of co-occurring taxa as features,  
313 those taxa tended to hold great influence over model performance. Indeed, these features  
314 were selected as the most important in models, typically exceeding host traits and abiotic  
315 conditions. Influential taxa spanned multiple phyla (Tables S5 & S6).

### 316 *Intraspecific trait variation does a poor job of predicting microbial abundances*

317 To better quantify the associations between microbial abundances and intraspecific variation in  
318 plant traits, we modeled microbiome variation within specific hosts. We did this because plant  
319 trait variation was confounded with nominal taxon. We only considered those combinations  
320 of host and microbe that were sampled at three or more locations, that were in 30% or more  
321 of hosts sampled, and that were present in at least 30 samples. 110 combinations of fungi  
322 and 15 geographically widespread host plants met these criteria, but only 9 combinations of  
323 host and bacterial taxa did. For absolute abundance data, 16 of the fungi-host combinations  
324 had  $R^2$  values between 0.01–0.08 but none of the models for the bacterial combinations  
325 met with any success. Phenology, relative chlorophyll, and compartment were influential  
326 features (Table S7). As we found in our models across hosts, model performance was greatest  
327 for relative abundance data—66 of the fungi-host combinations and 4 of the bacteria-host  
328 combinations had positive  $R^2$  values. For these models, SPAD 420, relative chlorophyll,  
329 compartment, phenology, and canopy cover were influential features (Table S8).

330 We repeated this analysis using occupancy data and noticed some improvement in model  
331 performance compared to the landscape-wide analysis: 81 combinations of fungal taxon and  
332 host and 3 bacterial combinations were modestly predictable ( $MCC \geq 0.2$ ). Median MCC for  
333 both bacteria-host combinations and fungi-host combinations was 0.12, as before models were  
334 challenged to predict microbial presences, not absences. About 4% of bacterial presences  
335 were correctly predicted and 13% of fungal presences were predicted (these are estimates of  
336 the median proportion predicted correctly across taxa). Compartment (either EP or EN),  
337 SPAD 420, tree richness, phenology, relative chlorophyll, and gh were the most important  
338 features for fungal models (Fig. S9; bacterial models were not considered because so few were  
339 successful).

### 340 *Microbial diversity was predictable but richness was not*

341 Shannon's diversity and estimated richness tended to be higher for fungi than bacteria  
342 (Fig. S17–S20). Patterns in richness and diversity among samples were few, though epiphyte  
343 diversity tended to be slightly *lower* than endophyte diversity for bacteria whereas the  
344 opposite was true for fungi (in many cases these comparisons were not significant, though the  
345 pattern is suggestive; Tables S10 & S11). No growth habit (i.e., tree, forb, shrub, graminoid)  
346 was much more diverse than any other, though we did find drastic differences among host  
347 taxa—particularly for fungi (Fig. S18, S19). The richest plant taxa in terms of fungi (but not  
348 bacteria) were trees and shrubs (this pattern held for both compartments; Tables S14, S15).



349 Neither fungal nor bacterial richness was predictable ( $R^2$  was near zero for both models).  
350 In contrast, models of Shannon's diversity were somewhat successful (fungi  $R^2 = 0.13$ ; bacteria:  
351  $R^2 = 0.08$ ). Important features for predicting fungal diversity included compartment (EP  
352 vs. EN), phenology, *Juniperus communis* (a widespread host plant taxon), and elevation  
353 (Fig. S21). Important features for bacterial diversity were different than those for fungal  
354 diversity and included densiometer measurements (canopy cover), date collected, and *Primula*  
355 *parryi* (an unusual plant taxon; Fig. S22). Diversity of both fungi and bacteria varied among  
356 host nominal taxa, and, indeed, certain taxa were strong predictors of shifts in diversity  
357 (Fig. S18, S19). When host taxon was omitted from models their performance declined  
358 slightly (dropping from 13% to 12% median explained variance for fungi and from 8% to 5%  
359 for bacteria). Inclusion of sampling site in our models, which was a proxy for soil variation  
360 and other unmeasured abiotic phenomena occurring at the sub- $km^2$  spatial scale did not  
361 improve predictions.

362 We found drastic differences in the ability to predict epiphyte versus endophyte data. For  
363 example, a model of bacterial endophyte diversity had an  $R^2$  of  $\sim 0.17$  (Fig. S25), but the  
364 model of bacterial epiphyte diversity had near zero explained variance. Fungal endophyte and  
365 epiphyte diversity were both predictable (10–14% explained variance), but feature importance  
366 was shuffled between models (Figs. S23, S24). Elevation and latitude were the most important  
367 features for epiphytes whereas the number of leaves extracted and two host taxa (*Juniperus*  
368 *communis* and *Antennaria media*) were the most important for fungi.

## 369 Discussion

370 Prediction of natural variation in phyllosphere microbial assemblages appears to be quite  
371 challenging. We found that only a few percent of foliar microbial taxa have predictable  
372 abundances or occurrences, even when using powerful machine learning to analyze a large  
373 dataset of over 1000 individual plants, 59 plant taxa, and 43 covariates that together  
374 characterized the foliar habitat. Our results are primarily due to the rarity of the majority of  
375 microbial life—most taxa were represented by a few reads in a few samples, making these  
376 taxa impractical to model. But predictive ability was low even for those few microbial taxa  
377 that were quite abundant and prevalent.

378 This has important implications for predictive ecology and biogeography—specifically,  
379 that we should not expect predictive modeling to be successful for most organisms, given that  
380 they are so infrequently observed. This observation almost seems trivial. However, we suggest  
381 that the literature does not reflect this inherent limitation within the data. Most publications  
382 assume that the biogeography of foliar microbiomes (and other microbiomes) is largely defined  
383 through deterministic, and thus predictable, causes. For example, our expectation for this  
384 project was that a large proportion of the variation in foliar microbiomes would be ascribable  
385 to the numerous aspects of the foliar habitat that we measured. However, the nature of  
386 ecological power laws (and sampling logistics) suggests that hard limits to prediction exist  
387 for most taxa, which should temper our expectations for the strength of associations between  
388 microbiome composition and habitat variation. Indeed, we are aware of no publications that  
389 demonstrate more than a moderate association between foliar microbiome composition and

390 habitat variation. By moderate association, we refer to such results as estimated  $R^2$  values  
391 from PERMANOVA analysis of dissimilarity matrices less than 0.4. We suggest that stronger  
392 associations may not be observable, given that most taxa are rare and, as we show here, even  
393 more abundant taxa are often very challenging to quantitatively predict. We suggest that  
394 the limits to prediction may be estimated through mathematical means, given estimation  
395 of the parameters for the distributions underlying the data. Such a theory driven approach  
396 could precisely bound expectations for microbial biogeography.

397 While it seems that precise predictive modeling of rare microbial taxa is out of reach,  
398 at least for now, we do not suggest that these myriad taxa are unimportant. Indeed, a  
399 growing body of work demonstrates that low-biomass microbes can perform critical ecological  
400 functions (Jousset et al. 2017; Kalenitchenko et al. 2018). Moreover, it is unclear if rare taxa  
401 bloom into abundance given suitable conditions (Shade et al. 2014), just as the seed bank of  
402 annual plants germinates following spring rainfall. Thus, some of the taxa we deemed rare  
403 in our snapshot-style study could be more abundant at other times of year or immediately  
404 following shifts in abiotic conditions or host phenology. This speculation suggests that  
405 incorporating data from intensive temporal sampling, particularly including sampling across  
406 host phenology, could improve predictive modeling of microbiome composition, though the  
407 aforementioned limitations likely will still exist.

#### 408 *Fungi and bacteria differed in abundances and predictability*

409 When summarizing the results from our models, we found several interesting patterns in  
410 predictive performance. Most notably, fungi tended to be easier to predict than bacteria,  
411 regardless of data set and model choice. This may be due to the much better sequencing  
412 results we obtained for fungi than bacteria. Plant chloroplast sequences dominated the 16S  
413 data (Fig. S6), a problem noted elsewhere (Maignien et al. 2014), and that suggests that  
414 plant chloroplasts are much more common than bacterial endophytes within most leaves.  
415 Karasov et al. (2019) reported similar findings. They used shotgun metagenomics, controlled  
416 infections, and qPCR to quantify the ratio of host to bacterial genomes as 1–2.5 within  
417 the leaves of wild *Arabidopsis thaliana* and that foliar microbes may not become extremely  
418 abundant except during infection. Given that *A. thaliana* is an annual forb with small leaves,  
419 it seems reasonable that a longer-lived plant with larger leaves could accrue more microbial  
420 taxa. Still, when taken together, our results and those from Karasov et al. (2019) suggest that  
421 the ratio of bacteria to host cells within the leaves of healthy plants is probably low, though  
422 much more quantitatively rigorous work is needed. Unfortunately, we could not compare the  
423 ratio of fungal to plant reads because we recovered few of the latter due to the specificity of  
424 our ITS primers.

#### 425 *Plant traits were only weakly associated with microbiome variation*

426 We uncovered associations between many plant traits and specific abundant microbial taxa,  
427 but the associations were typically weak and idiosyncratic. Interestingly, we included 24 plant  
428 traits in models and yet nominal plant taxon remained modestly important. This suggests a  
429 weak effect of unmeasured host traits on microbial assemblages, possibly directly, because

430 those traits could influence the ability for a microbe to encounter or live within a plant, and  
431 indirectly, since plant traits determine, at least in part, where a plant grows, and which  
432 other microbes might be present in the phyllosphere. While nominal taxon was an important  
433 feature in models, it is worth reiterating that removing this feature typically led to only a  
434 modest drop in  $R^2$ . Thus, our results suggest that trait variation alone is unlikely to explain  
435 a large fraction of the variation in foliar microbiome assemblages—because nominal taxon is  
436 a proxy for all unmeasured host phenotypic and genetic variation of relevance to the foliar  
437 microbiome.

438 Perhaps many easily observable plant traits are too far removed from the spatial scale of  
439 relevance for microbes to be strongly predictive of microbiome variation. Indeed, for many  
440 microbes a single leaf is the equivalent of the whole state of Wyoming (the study area) for a  
441 human. Those traits that were important were proxies for microhabitat variation in leaves,  
442 including leaf productivity (e.g., relative chlorophyll, SPAD 420), specific leaf area, area  
443 of leaf sampled, and phenology (Tables S2–S9). For logistical reasons, we did not measure  
444 elemental concentrations in leaves or various phytochemicals, though previous work has shown  
445 weak associations between these traits and microbial assemblage composition and they could  
446 be useful to include in future studies (González-Teuber et al. 2020; Kembel 2009; Kembel  
447 et al. 2014).

448 The lack of strong association between variation in plant traits and the microbiome is  
449 puzzling because numerous experiments have demonstrated, beyond all doubt, that many  
450 microbes can mediate plant trait expression (Friesen et al. 2011; Hawkes et al. 2021)—in  
451 some cases, dramatically (e.g., Doty 2011; Doty 2008). This disparity could arise from  
452 the frequency with which plants encounter microbes in the wild. Indeed, from before the  
453 day a seed germinates to after its last leaf senesces, plants are continually interacting with  
454 microbes. Thus, without experimental removal or inoculation of specific taxa, the effects  
455 of microbes on many, easily-measured plant traits may be very challenging to observe (and  
456 thus predict), since host plants have never escaped from their microbial influencers. We note  
457 that these influencers need not be abundant within plants. For example, we have previously  
458 demonstrated that low biomass foliar microbes can affect plant traits (Harrison et al. 2021b),  
459 and, in that study, the low biomass microbes were so infrequent within the sequencing data  
460 as to preclude predictive modeling.

461 *Perhaps unmeasured ecology is behind poor model performance—including microbe-microbe*  
462 *interactions.*

463 When we repeated modeling while including the abundances of co-occurring microbes as  
464 features, model performance tended to increase. This was not solely due to the additional  
465 complexity of models, because the addition of randomized versions of these features did  
466 not increase model performance. This suggests that microbe-microbe interactions, be they  
467 antagonistic or mutualistic, direct or indirect, are important determinants of phyllosphere  
468 microbiomes. Recent work supports this hypothesis (Hassani et al. 2018; Harrison et al.  
469 2021b), though mechanisms remain uncharacterized.

470 During modeling we focused on bottom-up forces, and including top-down pressures  
471 should improve model performance—after all, predicting the occurrence or abundance of

472 herbivores (e.g., ungulates, insects) would likely fail without considering predators. Indeed,  
473 Morella et al. (2018) recently demonstrated, in a manipulative setting, that phages can shape  
474 bacterial assemblage composition within plant leaves.

475 We consider the possibility that the abundances and occurrences of many microbial taxa  
476 within individual leaves and plants is largely unknowable, as driven by the vagaries of dispersal  
477 and priority effects. Priority effects describe the situation whereby the sequence of encounters  
478 between microbial taxa and the leaf define the resulting assemblage. (Leopold and Busby  
479 2020) recently demonstrated priority effects of fungi within the leaves of *Populus trichocarpa*,  
480 with order of immigration having effects on microbiome composition one month on.

481 Ecological drift is another stochastic force that shapes microbial assemblages via the  
482 aggregated influence of life history events (i.e., births and deaths; Vellend 2010). Ecological  
483 drift is notoriously difficult to study and so its influence on microbiome composition is debated  
484 (Zhou and Ning 2017), however theory from population genetics suggests that the influence  
485 of drift should decline with population size. Thus, we doubt that ecological drift plays a  
486 large role in our results, which focus on abundant microbial taxa, because these taxa should  
487 have high enough population densities when aggregated into samples that drift would have  
488 negligible influence assuming any differences among taxa in competitive ability or suitability  
489 to the habitat. However, ecological drift could be important for shaping the abundances of  
490 rarer taxa or ecologically equivalent taxa within an assemblage.

491 *Why are absolute abundances harder to predict than relative abundances?*

492 For all of our analyses, we compared results using relative abundances and absolute abundances.  
493 Most microbial ecology studies rely on the former, because sequencing machines output relative  
494 abundance data (Tsilimigras and Fodor 2016). Incorporating internal standards (ISDs) during  
495 sequencing can allow absolute abundances to be approximated, though the approach is not  
496 without methodological challenges (Harrison et al. 2021c). We found that relative abundances  
497 were easier to predict than were absolute abundances, for both bacteria and fungi and  
498 regardless of scale, *except* when the abundances of co-occurring microbial taxa were included  
499 as features in models.

500 These results could be driven by biology: specifically, because the absolute abundances  
501 of microbes may shift in response to co-occurring microbial taxa or numerous unmeasured  
502 phenomena. Or, perhaps model  $R^2$  is higher for relative abundance models, because relative  
503 abundances are potentially more constrained than absolute abundances.

504 *The way forward*

505 Over the past decade, phyllosphere microbial ecologists have explored the deterministic  
506 factors that shape foliar microbiomes. The numerous associations between plant traits,  
507 abiotic conditions, and microbial community composition that have been reported suggest  
508 that deterministic forces do matter. However, many of the associations described have been  
509 fairly weak, which led us to probe the limits of the approach through the use of a large  
510 dataset and an explicitly predictive paradigm. Our results were poor, partly because of the  
511 inherent challenge of predicting abundances and occurrences of rare taxa. However, even for

512 the most well-observed microbial taxa in our survey, modeling was challenging. Our goal  
513 here was to explore if microbiome composition could be predicted, thus we did not build  
514 models at various taxonomic levels (e.g., at the phylum or genus level)—such models would  
515 be a potentially informative, next step.

516 The general failure of our models confirms that predictive phyllosphere ecology will  
517 require more than an encyclopedic characterization of the foliar habitat and its influence on  
518 microbial taxa. Instead, future work could profitably explore the influence of microbe-microbe  
519 interactions, top-down pressure (predation, e.g., by phages) and priority effects on foliar  
520 microbiome community composition. While such work will undoubtedly push the limits of  
521 prediction past what we present here, we suspect that the long-tailed rank-abundance curves  
522 typical of foliar microbiomes imply inherent constraints to predictive microbiology do exist.

## 523 Acknowledgments

524 Funding was provided by the National Science Foundation EPSCoR grant 1655726. Computing  
525 was performed at the Advanced Research Computing Center, University of Wyoming, Laramie  
526 (<https://doi.org/10.15786/M2FY47>). Thanks to Ankita Arun Sawant, Jeff Waller, and  
527 William Herrick for laboratory assistance; Ernie Nelson and the Rocky Mountain Herbarium  
528 at the University of Wyoming for assistance identifying specimens; Gregg Randolph for  
529 guidance during library preparation; and W. John Calder and Matthew L. Forister for helpful  
530 advice.

## 531 Author Contributions

532 JH and CAB designed the research; JH performed the research including field and lab work,  
533 data analysis and interpretation. JH and CAB both contributed to writing and editing the  
534 manuscript.

## 535 Data availability

536 Voucher specimens of plant hosts are available at the Rocky Mountain Herbarium at the  
537 University of Wyoming. All scripts and plant trait data are available at the following DOI:  
538 [10.5281/zenodo.6112672](https://doi.org/10.5281/zenodo.6112672). Raw and processed sequence data are available at: DOI for data is  
539 forthcoming and will be available prior to publication.

## References

Agler, Matthew T. et al. (2016). “Microbial hub taxa link host and abiotic factors to plant microbiome variation”. *PLOS Biology* 14.1, e1002352.



- Arnold, A. Elizabeth and Edward Allen Herre (2003). “Canopy cover and leaf age affect colonization by tropical fungal endophytes: ecological pattern and process in *Theobroma cacao* (Malvaceae)”. *Mycologia* 95.3, pp. 388–398.
- Arnold, A. Elizabeth and F. Lutzoni (2007). “Diversity and host range of foliar fungal endophytes: are tropical leaves biodiversity hotspots?” *Ecology* 88.3, pp. 541–549.
- Arnold, A.E. et al. (2000). “Are tropical fungal endophytes hyperdiverse?” *Ecology Letters* 3.4, pp. 267–274.
- Aung, Kyaw, Yanjuan Jiang, and Sheng Yang He (2018). “The role of water in plant–microbe interactions”. *The Plant Journal* 93.4, pp. 771–780.
- Bowman, Elizabeth A. and A. Elizabeth Arnold (2021). “Drivers and implications of distance decay differ for ectomycorrhizal and foliar endophytic fungi across an anciently fragmented landscape”. *The ISME Journal*, pp. 1–18.
- Breiman, Leo (2001). “Random forests”. *Machine Learning* 45.1, pp. 5–32.
- Carini, Paul (2019). “A “cultural” renaissance: genomics breathes new life into an old craft”. *mSystems* 4.3, e00092–19.
- Carvalho, Sofia D. and José A. Castillo (2018). “Influence of light on plant–phyllosphere interaction”. *Frontiers in Plant Science* 9, p. 1482.
- Coleman-Derr, Devin et al. (2016). “Plant compartment and biogeography affect microbiome composition in cultivated and native *Agave* species”. *New Phytologist* 209.2, pp. 798–811.
- Community, UNITE (2017). “UNITE USEARCH/UTAX release. Version 01.12.2017.”
- Cook, Daniel et al. (2012). “Influence of phenological stage on swainsonine and endophyte concentrations in *Oxytropis sericea*”. *Journal of Chemical Ecology* 38.2, pp. 195–203.
- Cruz, Jeffrey A. et al. (2001). “Contribution of electric field ( $\Delta\Psi$ ) to steady-state transthylakoid proton motive force (pmf) in vitro and in vivo. Control of pmf parsing into  $\Delta\Psi$  and  $\Delta\text{pH}$  by ionic strength”. *Biochemistry* 40.5, pp. 1226–1237.
- Cutler, D. Richard et al. (2007). “Random forests for classification in ecology”. *Ecology* 88.11, pp. 2783–2792.
- DeSantis, T. Z. et al. (2006). “Greengenes, a chimera-checked 16S rRNA gene database and workbench compatible with ARB”. *Applied and Environmental Microbiology* 72.7, pp. 5069–5072.
- Doan, Hung et al. (2020). “Topography-driven shape, spread, and retention of leaf surface water impacts microbial dispersion and activity in the phyllosphere”. *Phytobiomes Journal*.
- Doty, Sharon Lafferty (2008). “Enhancing phytoremediation through the use of transgenics and endophytes”. *New Phytologist* 179.2, pp. 318–333.
- (2011). “Growth-promoting endophytic fungi of forest trees”. *Endophytes of Forest Trees: Biology and Applications*. Ed. by Anna Maria Pirttilä and A. Carolin Frank. Forestry Sciences. Dordrecht: Springer Netherlands, pp. 151–156.
- Dray, S et al. (2016). “adespatial: multivariate multiscale spatial analysis.” *R package* 0.0-3.
- Edgar, Robert (2016). “SINTAX: a simple non-Bayesian taxonomy classifier for 16S and ITS sequences”. *bioRxiv*, p. 074161.
- Fahimipour, Ashkaan K. et al. (2018). “Daylight exposure modulates bacterial communities associated with household dust”. *Microbiome* 6.1, p. 175.
- Fernandes, G. Wilson et al. (2011). “Hail impact on leaves and endophytes of the endemic threatened *Coccoloba cereifera* (Polygonaceae)”. *Plant Ecology* 212.10, pp. 1687–1697.



- Friesen, Maren L. et al. (2011). “Microbially mediated plant functional traits”. *Annual Review of Ecology, Evolution, and Systematics* 42.1, pp. 23–46.
- Genty, Bernard, Jean-Marie Briantais, and Neil R. Baker (1989). “The relationship between the quantum yield of photosynthetic electron transport and quenching of chlorophyll fluorescence”. *Biochimica et Biophysica Acta (BBA) - General Subjects* 990.1, pp. 87–92.
- Geurts, Pierre, Damien Ernst, and Louis Wehenkel (2006). “Extremely randomized trees”. *Machine Learning* 63.1, pp. 3–42.
- Gomes, Teresa et al. (2018). “Endophytic and epiphytic phyllosphere fungal communities are shaped by different environmental factors in a mediterranean ecosystem”. *Microbial Ecology* 76.3, pp. 668–679.
- González-Teuber, Marcia et al. (2020). “Leaf resistance traits influence endophytic fungi colonization and community composition in a South American temperate rainforest”. *Journal of Ecology* 108.3, pp. 1019–1029.
- Griffin, Eric A. and Walter P. Carson (2018). “Tree endophytes: cryptic drivers of tropical forest diversity”. *Endophytes of Forest Trees*. Forestry Sciences. Springer, Cham, pp. 63–103.
- Griffin, Eric A. et al. (2016). “Foliar bacteria and soil fertility mediate seedling performance: a new and cryptic dimension of niche differentiation”. *Ecology* 97.11, pp. 2998–3008.
- Harrison, Joshua G. and Eric A. Griffin (2020). “The diversity and distribution of endophytes across biomes, plant phylogeny and host tissues: how far have we come and where do we go from here?” *Environmental Microbiology* 22.6, pp. 2107–2123.
- Harrison, Joshua G., Gregory D. Randolph, and C. Alex Buerkle (2021a). “Characterizing microbiomes via sequencing of marker loci: techniques to improve throughput, account for cross-contamination, and reduce cost”. *mSystems* 0.0, e00294–21.
- Harrison, Joshua G. et al. (2016). “Vertical stratification of the foliar fungal community in the world’s tallest trees”. *American Journal of Botany* 103.12, pp. 2087–2095.
- Harrison, Joshua G. et al. (2020a). “Dirichlet-multinomial modelling outperforms alternatives for analysis of microbiome and other ecological count data”. *Molecular Ecology Resources* 20.2, pp. 481–497.
- Harrison, Joshua G. et al. (2021b). “A suite of rare microbes interacts with a dominant, heritable, fungal endophyte to influence plant trait expression”. *The ISME Journal*, pp. 1–16.
- Harrison, Joshua G. et al. (2021c). “The quest for absolute abundance: The use of internal standards for DNA-based community ecology”. *Molecular Ecology Resources* 21.1, pp. 30–43.
- Harrison, Joshua et al. (2020b). *CNVRG: Dirichlet-multinomial modelling of relative abundance data (R package)*.
- Hassani, M. Amine, Paloma Durán, and Stéphane Hacquard (2018). “Microbial interactions within the plant holobiont”. *Microbiome* 6, p. 58.
- Hawkes, Christine V. et al. (2021). “Extension of plant phenotypes by the foliar microbiome”. *Annual Review of Plant Biology* 72.1, pp. 823–846.
- Hubbard, Charley J. et al. (2017). “The plant circadian clock influences rhizosphere community structure and function”. *The ISME Journal* 12.2, p. 400.
- Hubbell, Stephen (2001). *The unified neutral theory of biodiversity and biogeography*. Princeton, New Jersey: Princeton University Press.

- Humphrey, Parris T. and Noah K. Whiteman (2020). “Insect herbivory reshapes a native leaf microbiome”. *Nature Ecology & Evolution* 4.2, pp. 221–229.
- Jackson, Donald A. (1997). “Compositional data in community ecology: the paradigm or peril of proportions?” *Ecology* 78.3, pp. 929–940.
- Jousset, Alexandre et al. (2017). “Where less may be more: how the rare biosphere pulls ecosystems strings”. *The ISME Journal* 11.4, pp. 853–862.
- Kalenitchenko, Dimitri et al. (2018). “Ultrarare marine microbes contribute to key sulphur-related ecosystem functions”. *Molecular Ecology* 27.6, pp. 1494–1504.
- Kanazawa, Atsuko and David M. Kramer (2002). “In vivo modulation of nonphotochemical exciton quenching (NPQ) by regulation of the chloroplast ATP synthase”. *Proceedings of the National Academy of Sciences* 99.20, pp. 12789–12794.
- Karasov, Talia L. et al. (2019). “The relationship between microbial biomass and disease in the *Arabidopsis thaliana* phyllosphere”. *bioRxiv*, p. 828814.
- Kembel, Steven W. (2009). “Disentangling niche and neutral influences on community assembly: assessing the performance of community phylogenetic structure tests”. *Ecology Letters* 12.9, pp. 949–960.
- Kembel, Steven W. and Rebecca C. Mueller (2014). “Plant traits and taxonomy drive host associations in tropical phyllosphere fungal communities”. *Botany* 92.4, pp. 303–311.
- Kembel, Steven W. et al. (2014). “Relationships between phyllosphere bacterial communities and plant functional traits in a neotropical forest”. *Proceedings of the National Academy of Sciences* 111.38, pp. 13715–13720.
- Kinkel, L. L. et al. (1987). “Leaves as islands for microbes”. *Oecologia* 71.3, pp. 405–408.
- Knoth, Jenny L. et al. (2013). “Effects of cross host species inoculation of nitrogen-fixing endophytes on growth and leaf physiology of maize”. *GCB Bioenergy* 5.4, pp. 408–418.
- Kramer, David M., Colette A. Sacksteder, and Jeffrey A. Cruz (1999). “How acidic is the lumen?” *Photosynthesis Research* 60.2, pp. 151–163.
- Kramer, David M. et al. (2004). “New fluorescence parameters for the determination of QA redox state and excitation energy fluxes”. *Photosynthesis Research* 79.2, p. 209.
- Kuhlgert, Sebastian et al. (2016). “MultispeQ Beta: a tool for large-scale plant phenotyping connected to the open PhotosynQ network”. *Royal Society Open Science* 3.10.
- Laforest-Lapointe, Isabelle, Christian Messier, and Steven W. Kembel (2016). “Host species identity, site and time drive temperate tree phyllosphere bacterial community structure”. *Microbiome* 4.1, p. 27.
- Laforest-Lapointe, Isabelle et al. (2017). “Leaf bacterial diversity mediates plant diversity and ecosystem function relationships”. *Nature* 546.7656, pp. 145–147.
- Lajoie, Geneviève and Steven W. Kembel (2021). “Host neighborhood shapes bacterial community assembly and specialization on tree species across a latitudinal gradient”. *Ecological Monographs* 91.2, e01443.
- Lang, Michel et al. (2019). “mlr3: A modern object-oriented machine learning framework in R”. *Journal of Open Source Software* 4.44, p. 1903.
- Lau, Matthew K., A. Elizabeth Arnold, and Nancy Collins Johnson (2013). “Factors influencing communities of foliar fungal endophytes in riparian woody plants”. *Fungal Ecology* 6.5, pp. 365–378.
- Legendre, Pierre and Eugene D Gallagher (2001). “Ecologically meaningful transformations for ordination of species data”. *Oecologia* 129.2, pp. 271–280.

- Leopold, Devin R. and Posy E. Busby (2020). “Joint effects of host genotype and species arrival order govern microbiome composition and function”. *bioRxiv*, p. 2020.02.28.970582.
- Li, Lisha et al. (2017). “Hyperband: a novel bandit-based approach to hyperparameter optimization”. *The Journal of Machine Learning Research* 18.1, pp. 6765–6816.
- Liu, Junwei et al. (2019). “Host identity and phylogeny shape the foliar endophytic fungal assemblages of *Ficus*”. *Ecology and Evolution* 9.18, pp. 10472–10482.
- Locey, Kenneth J. and Jay T. Lennon (2016). “Scaling laws predict global microbial diversity”. *Proceedings of the National Academy of Sciences* 113.21, pp. 5970–5975.
- Lodge, D Jean, PJ Fisher, and BC Sutton (1996). “Endophytic fungi of *Manilkara bidentata* leaves in Puerto Rico”. *Mycologia*, pp. 733–738.
- Maignien, Loïs et al. (2014). “Ecological succession and stochastic variation in the assembly of *Arabidopsis thaliana* phyllosphere communities”. *mBio* 5.1, e00682–13.
- Matthews, B. W. (1975). “Comparison of the predicted and observed secondary structure of T4 phage lysozyme”. *Biochimica et Biophysica Acta (BBA) - Protein Structure* 405.2, pp. 442–451.
- May, Robert M. (2019). *Stability and Complexity in Model Ecosystems*. Princeton University Press.
- Mittelbach, Gary G. et al. (2007). “Evolution and the latitudinal diversity gradient: speciation, extinction and biogeography”. *Ecology Letters* 10.4, pp. 315–331.
- Morella, Norma M. et al. (2018). “The impact of bacteriophages on phyllosphere bacterial abundance and composition”. *Molecular Ecology* 27.8, pp. 2025–2038.
- Nilsson, R. Henrik et al. (2018). “Mycobiome diversity: high-throughput sequencing and identification of fungi”. *Nature Reviews Microbiology*, p. 1.
- Oita, Shuzo et al. (2021). “Climate and seasonality drive the richness and composition of tropical fungal endophytes at a landscape scale”. *Communications Biology* 4.1, pp. 1–11.
- Pianka, Eric R. (1966). “Latitudinal gradients in species diversity: a review of concepts”. *The American Naturalist* 100.910, pp. 33–46.
- Rho, Hyungmin et al. (2018). “Do endophytes promote growth of host plants under stress? A meta-analysis on plant stress mitigation by endophytes”. *Microbial Ecology* 75.2, pp. 407–418.
- Rognes, Torbjørn et al. (2016). “VSEARCH: a versatile open source tool for metagenomics”. *PeerJ* 4.
- Sacksteder, Colette A. et al. (2000). “The proton to electron stoichiometry of steady-state photosynthesis in living plants: A proton-pumping Q cycle is continuously engaged”. *Proceedings of the National Academy of Sciences* 97.26, pp. 14283–14288.
- Sanchez-Azofeifa, Arturo et al. (2012). “Relationships between endophyte diversity and leaf optical properties”. *Trees* 26.2, pp. 291–299.
- Schneider, Caroline A., Wayne S. Rasband, and Kevin W. Eliceiri (2012). “NIH Image to ImageJ: 25 years of image analysis”. *Nature Methods* 9.7, pp. 671–675.
- Shade, Ashley et al. (2014). “Conditionally rare taxa disproportionately contribute to temporal changes in microbial diversity”. *mBio* 5.4.
- Singer, G. a. C. et al. (2019). “Comprehensive biodiversity analysis via ultra-deep patterned flow cell technology: a case study of eDNA metabarcoding seawater”. *Scientific Reports* 9.1, pp. 1–12.

- Tourlousse, Dieter M. et al. (2017). “Synthetic spike-in standards for high-throughput 16S rRNA gene amplicon sequencing”. *Nucleic Acids Research* 45.4, e23–e23.
- Tsilimigras, Matthew C. B. and Anthony A. Fodor (2016). “Compositional data analysis of the microbiome: fundamentals, tools, and challenges”. *Annals of Epidemiology*. The Microbiome and Epidemiology 26.5, pp. 330–335.
- Vellend, M (2010). “Conceptual synthesis in community ecology.” *The Quarterly review of biology* 85.2, pp. 183–206.
- Vincent, JB, GD Weiblen, and G May (2015). “Host associations and beta diversity of fungal endophyte communities in New Guinea rainforest trees”. *Molecular ecology*.
- Wang, Yong and Pei-Yuan Qian (2009). “Conservative fragments in bacterial 16S rRNA genes and primer design for 16S ribosomal DNA amplicons in metagenomic studies”. *PLOS ONE* 4.10, e7401.
- White, Thomas J et al. (1990). *Amplification and direct sequencing of fungal ribosomal RNA genes for phylogenetics*. In M. A. Innis, D. H. Gelfand, J. J. Sninsky, and T. J. White [eds.], *PCR protocols: A guide to methods and applications*. London, UK: Academic Press.
- Willis, Amy and John Bunge (2015). “Estimating diversity via frequency ratios”. *Biometrics* 71.4, pp. 1042–1049.
- Wright, Marvin N. and Andreas Ziegler (2017). “ranger: A Fast Implementation of Random Forests for High Dimensional Data in C++ and R”. *Journal of Statistical Software* 77.1.
- Wu, Lingshang et al. (2013). “Geographic and tissue influences on endophytic fungal communities of *Taxus chinensis* var. *mairei* in China”. *Current Microbiology* 66.1, pp. 40–48.
- Yu, Zhongdong et al. (2021). “Foliar endophytes in trees varying greatly in age”. *European Journal of Plant Pathology*.
- Zhou, Jizhong and Daliang Ning (2017). “Stochastic community assembly: does it matter in microbial ecology?” *Microbiology and Molecular Biology Reviews* 81.4, e00002–17.
- Zimmerman, Naupaka B and Peter M Vitousek (2012). “Fungal endophyte communities reflect environmental structuring across a Hawaiian landscape”. *Proceedings of the National Academy of Sciences* 109.32, pp. 13022–13027.

Table 1: Predictor variables (features), including plant traits and abiotic conditions, measured for this study. Details of measurement and citations explaining the method or supporting the possible influence of the feature are shown. We apologize to the many scientists whose work was omitted due to space limitations.

| Predictor variable                 | Description                                                                                                                                              | Citations                                                      |
|------------------------------------|----------------------------------------------------------------------------------------------------------------------------------------------------------|----------------------------------------------------------------|
| Absorbance of leaves at 940 nm     | Measured using the PhotosynQ multispeQ handheld spectrophotometer.                                                                                       | (Carvalho and Castillo 2018; Sanchez-Azofeifa et al. 2012)     |
| Ambient humidity                   | Relative humidity (%)                                                                                                                                    | (Aung et al. 2018)                                             |
| Area                               | Leaf area measured in cm <sup>2</sup>                                                                                                                    | (Kinkel et al. 1987)                                           |
| Circumference of stem              | Circumference of trees 1.5 m from the ground                                                                                                             | (Yu et al. 2021)                                               |
| Compartment                        | Endophyte (EN) or epiphyte (EP). Putative endophytes were obtained from washed leaves, while epiphytes were obtained from the liquid used to wash leaves | (Coleman-Derr et al. 2016)                                     |
| Date                               | Julian date of sampling, starting from Jan 1                                                                                                             | (Arnold and Herre 2003)                                        |
| Dead & down                        | The number of dead trees lying on the ground at the site                                                                                                 | Decaying wood could be an inoculum source.                     |
| Densiometer                        | Densiometer measurements above each of the four floral composition quadrants, ranges from 0–4, average taken for each site                               | An index of canopy closure at the site.                        |
| Electrochromic shift (ECS) initial | Measurement of ATP synthase activity. Measured using the PhotosynQ multispeQ handheld spectrophotometer.                                                 | (Cruz et al. 2001; Kramer et al. 1999; Sacksteder et al. 2000) |
| Elevation                          | Measured in meters                                                                                                                                       | (Zimmerman and Vitousek 2012)                                  |

|                               |                                                                                                                                                                     |                                                                                                                                 |
|-------------------------------|---------------------------------------------------------------------------------------------------------------------------------------------------------------------|---------------------------------------------------------------------------------------------------------------------------------|
| Fs                            | Light-adapted steady state fluorescence. Measured using the PhotosynQ multispeQ handheld spectrophotometer.                                                         | (Genty et al. 1989)                                                                                                             |
| gH                            | Proton conductivity. Measured using the PhotosynQ multispeQ handheld spectrophotometer.                                                                             | (Kanazawa and Kramer 2002)                                                                                                      |
| Habit                         | Growth habit, either shrub, forb, graminoid, or tree                                                                                                                | (Harrison and Griffin 2020)                                                                                                     |
| Height of sample              | Height in meters above ground of the sampling location on the plant                                                                                                 | (Harrison et al. 2016)                                                                                                          |
| Host taxon                    | Specific epithet of the host plant                                                                                                                                  | The influence of host has been found in all papers of which we are familiar, though it can be quite weak (Vincent et al. 2015). |
| Latitude                      | Latitude of site                                                                                                                                                    | (Arnold and Lutzoni 2007)                                                                                                       |
| Longitude                     | Longitude of site                                                                                                                                                   | (Wu et al. 2013)                                                                                                                |
| Leaf temperature differential | Contactless temperature (leaf surface temperature) minus ambient temperature. Measured using the PhotosynQ multispeQ handheld spectrophotometer.                    | –                                                                                                                               |
| Leaves extracted              | Number of leaves or leaflets from which DNA was extracted                                                                                                           | (Arnold et al. 2000)                                                                                                            |
| Linear electron flow (LEF)    | Measurement of the movement of electrons from water to NADP+ during photosynthesis. Measured using the PhotosynQ multispeQ handheld spectrophotometer.              | (Genty et al. 1989)                                                                                                             |
| Light intensity PAR           | Photosynthetically active radiation. Fraction of light (400–700nm) important for photosynthesis. Measured using the PhotosynQ multispeQ handheld spectrophotometer. | (Carvalho and Castillo 2018; Fahimipour et al. 2018)                                                                            |
| Mass extracted                | Grams of leaf material from which DNA was extracted.                                                                                                                | (Kinkel et al. 1987)                                                                                                            |



|                                    |                                                                                                                                            |                                                   |
|------------------------------------|--------------------------------------------------------------------------------------------------------------------------------------------|---------------------------------------------------|
| Moran's eigenvector map (MEM) 1, 2 | Two MEMs created from latitude and longitude data of each site.                                                                            | (Bowman and Arnold 2021)                          |
| Phenological status                | Categorical. One of fruiting, vegetative, flowering.                                                                                       | (Cook et al. 2012)                                |
| Phi NO                             | Non-regulatory energy dissipation. Measured using the PhotosynQ multispeQ handheld spectrophotometer.                                      | –                                                 |
| Phi NPQ                            | Measurement of non-photochemical quenching. Measured using the PhotosynQ multispeQ handheld spectrophotometer.                             | –                                                 |
| Plant volume                       | Volume of a box that could fit over the plant                                                                                              | (Rho et al. 2018)                                 |
| Precipitation                      | Mean precip. during April (the month prior to the start of sampling)                                                                       | (Zimmerman and Vitousek 2012)                     |
| qL                                 | Photosystem II redox state from the “lake” model. Measured using the PhotosynQ multispeQ handheld spectrophotometer.                       | (Kramer et al. 2004)                              |
| Relative chlorophyll intensity     | A parameter derived by the multispeQ describing absorbance intensity of chlorophyll.                                                       | (Sanchez-Azofeifa et al. 2012)                    |
| Relative chlorophyll               | A parameter derived by the multispeQ from absorbance measurements at 650 and 940 nm that provides an estimate of chlorophyll concentration | (Sanchez-Azofeifa et al. 2012)                    |
| Shannon's veg. diversity           | Vegetation diversity from Daubenmire plots within each site                                                                                | (Griffin and Carson 2018; Lajoie and Kembel 2021) |
| Shrub richness                     | The number of shrub species at the site                                                                                                    | (Griffin and Carson 2018; Lajoie and Kembel 2021) |
| Specific leaf area (SLA)           | Leaf area divided by leaf mass                                                                                                             | (Knoth et al. 2013; Liu et al. 2019)              |

|                             |                                                                                                                                                                                                                                                                                                                                                                                                                    |                                                   |
|-----------------------------|--------------------------------------------------------------------------------------------------------------------------------------------------------------------------------------------------------------------------------------------------------------------------------------------------------------------------------------------------------------------------------------------------------------------|---------------------------------------------------|
| Slope percentage            | The slope of the site measured in percent                                                                                                                                                                                                                                                                                                                                                                          | –                                                 |
| SPAD intensity at 420       | Special Products Analysis Division (SPAD) - estimation of relative chlorophyll content from absorbance measurements. SPAD is a constant times relative chlorophyll content. This constant is defined by the multispeQ and approximates a proprietary constant from a Konica-Minolta chlorophyll measurement device. Because of high correlation of the measurement for different wavelengths only 420 nm was used. | (Sanchez-Azofeifa et al. 2012)                    |
| Temperature                 | Ambient temperature in degrees Celsius. Measured using the PhotosynQ multispeQ handheld spectrophotometer.                                                                                                                                                                                                                                                                                                         | (Zimmerman and Vitousek 2012)                     |
| Temperature one month prior | Average temperature in April, the month before sampling started                                                                                                                                                                                                                                                                                                                                                    | (Zimmerman and Vitousek 2012)                     |
| Time of day                 | Sampling time                                                                                                                                                                                                                                                                                                                                                                                                      | (Hubbard et al. 2017)                             |
| Thickness                   | Leaf thickness in $\mu\text{m}$                                                                                                                                                                                                                                                                                                                                                                                    | (González-Teuber et al. 2020)                     |
| Leaf toughness              | Measured in g with Chatillon penetrometer                                                                                                                                                                                                                                                                                                                                                                          | (Arnold and Herre 2003)                           |
| Tree richness               | Number of tree species within plot                                                                                                                                                                                                                                                                                                                                                                                 | (Griffin and Carson 2018; Lajoie and Kembel 2021) |
| Water retention             | Ability of a leaf to hold a water droplet as a function of leaf angle, measured in degrees.                                                                                                                                                                                                                                                                                                                        | (Doan et al. 2020)                                |

---

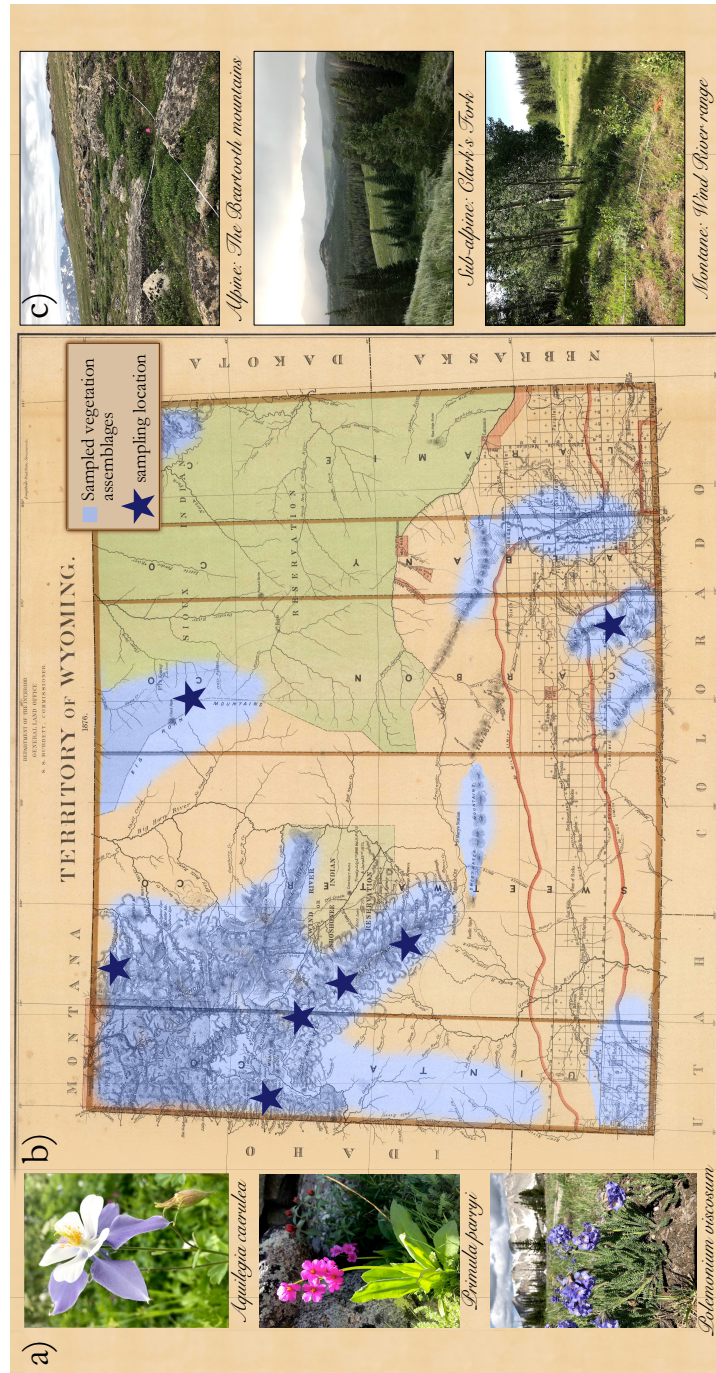

Figure 1: Example plant taxa sampled (a) and sampling locations in Wyoming, U.S.A (b). Each star denotes a sampling region—at each region, sampling took place at three different elevations. Sites were chosen within the alpine, sub-alpine and montane vegetation zones (examples shown in c). The portion of the map shaded blue approximately denotes the geographical extent of the vegetation types surveyed. Plant taxa sampled included dominant trees, shrubs, and forbs, along with interesting less common plants, with the goal of sampling ~80% of above-ground biomass. The map shown is from 1876, several years before Wyoming became a state. Political jurisdictions of the day are shown along with the portion of the state occupied by the Union-Pacific railroad (delineated in pink lines at the bottom of the map). All photographs by J. G. Harrison; map is part of the public domain.

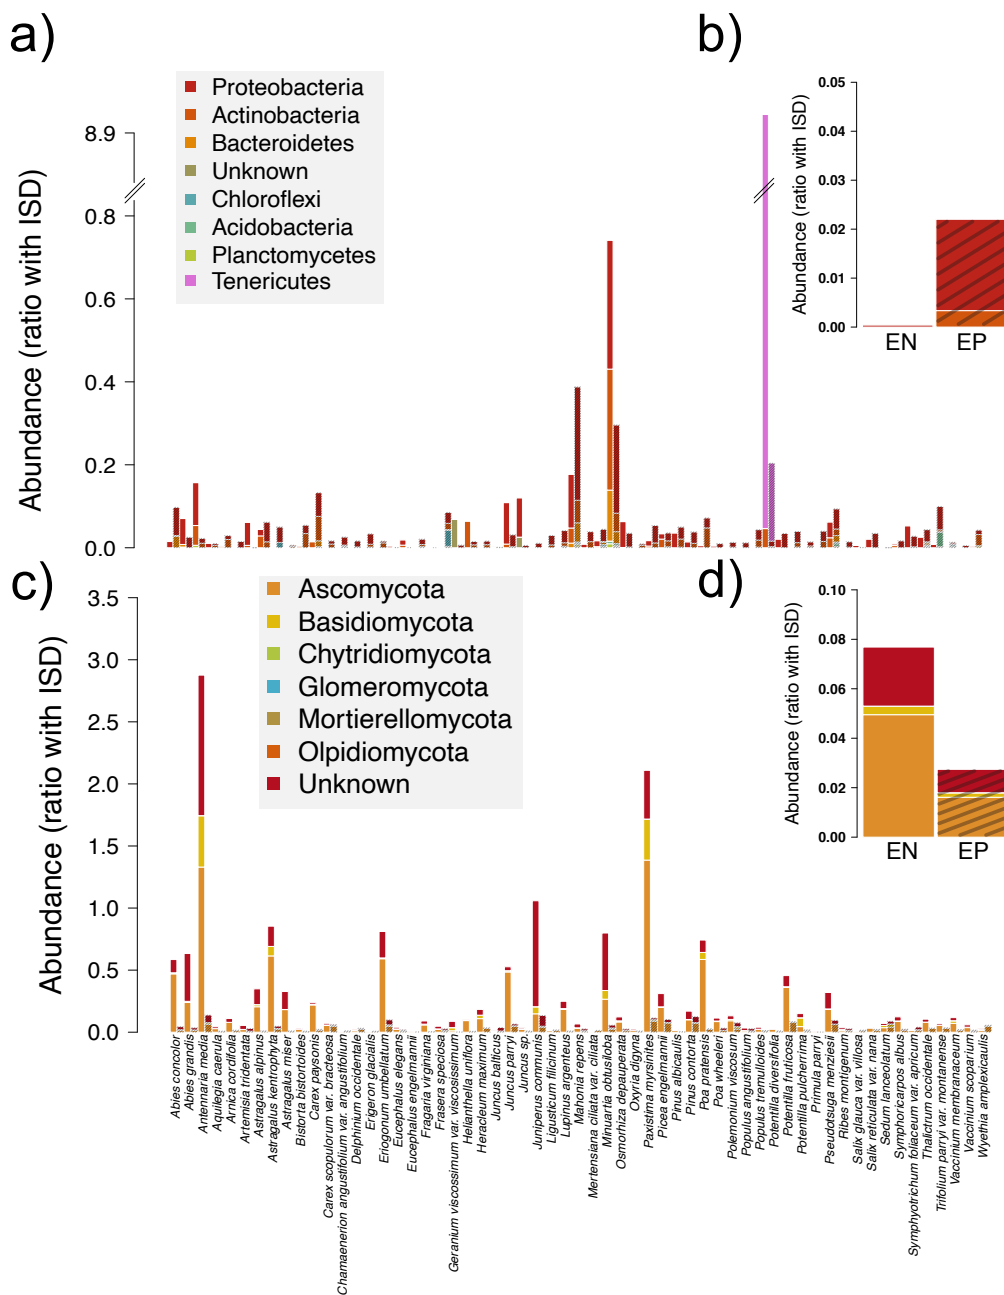

Figure 2: Biodiversity of phyllosphere microbes across 59 plant taxa collected from the mountain ranges of Wyoming, U.S.A. Hash marks are superimposed on epiphyte data. Data shown are median estimates of the relative abundances of phyla across samples. An internal standard (ISD) was included in each sample and used to place abundances on a standard scale (see main text). Panel a) shows abundance by phylum and host taxon for bacteria. Panel b) shows abundance by phylum and compartment for bacteria. Panels c) and d) repeat this motif for fungi.

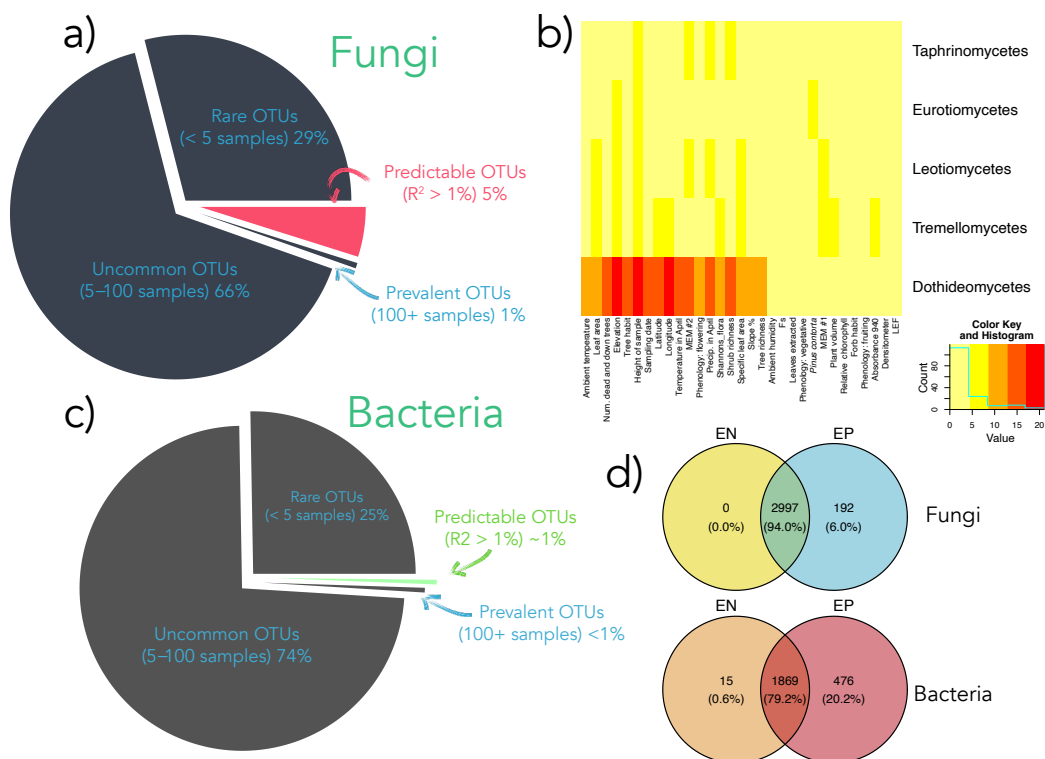

Figure 3: Most microbial taxa, be they fungal (a) or bacterial (c), had unpredictable abundances, in part because most taxa occurred in very few samples. Feature importances from models of fungal relative abundance are shown as a heatmap (b), with features that were more important for certain taxa shaded more darkly. Heatmaps were not generated for bacteria, because models for these taxa had poor performance. Features chosen were in the top ten most important for successful models (those models with an  $R^2$  over 1%) and were important for at least 20% of all successful models (thus those features that were important for isolated taxa are not shown here, for the sake of visualization). Only the fungal classes that each had at least five successful models are shown. For a similar figure, but for fungal occurrence models, see Fig. S15. Importantly, when models were rerun while including the abundances of certain co-occurring microbial taxa, model performance improved, though not beyond what is shown here. Microbial abundance features were typically some of the most influential in the model (see main text). d) Venn diagrams showing the number and proportion of microbial taxa that occurred as epiphytes (EP) or endophytes (EN) or both.



## Supplementary Material

### *Field sampling details*

Sampling locations were chosen to maximize geographical coverage within the state, facilitate reasonable access, and ensure specific vegetation assemblages were sampled. Climate data for each site from the month prior to sampling were downloaded from PRISM (PRISM Climate Group, Oregon State University, <http://prism.oregonstate.edu>). To control for the effect of aspect, all plots were located on west-facing slopes.

Plant taxa were chosen to ensure that approximately 80% or more of the biomass at each site was sampled (as visually estimated) and to maximize the phylogenetic and phenotypic breadth surveyed. Samples were collected using flame sterilized forceps, bagged, stored on ice, and frozen within approximately 12 hours of collection using a battery-powered freezer. At least three leaflets were sampled from most individuals, except for plant taxa with very large leaves, where a single leaf was removed for DNA extraction. Because of the necessity of sampling different numbers of leaves among taxa, the mass of leaf material from which DNA was extracted was included in models.

Within each plot, two transect tapes were placed along the cardinal axes with the intersection of the two tapes in the center of the plot. These tapes served as a Cartesian coordinate system. For focal plant taxa, random coordinates were generated and the nearest individual to those coordinates was sampled. If a plant taxon only occurred in a portion of the plot, individuals were sampled haphazardly. To characterize overall vegetation composition in each plot, all plant taxa within four randomly located 1m quadrats were assigned to one of the following cover classes:  $\leq 0.1\%$ , 0.1–5%, 5–25%, 26–50%, 51–75%, 76–95%. Data from each quadrat were aggregated by site and floral diversity (exponentiated Shannon's) was calculated from the upper values of the ranges for each cover class.

For each focal plant, phenology, height, width at widest point, the width perpendicular to this point, and the product of these measurements, were collected. For trees, trunk diameter at ~1.5m above the ground was also measured. A leaf proximal to those sampled for DNA extraction was removed for measurement of leaf area, specific leaf area (also known as density), leaf toughness (using a Chatillon 516-0500 force gauge), and water drop retention ability. The leaf was chosen such that it was the approximately equal in size and shape to those chosen for DNA extraction. It was not practical to perform DNA extraction on the same leaf used for these measurements due to contamination concerns. Water drop retention ability was the angle (in degrees) at which a droplet of water (4–5 $\mu$ l) placed on the leaf surface began to move. Leaves were dried, digitally imaged, and leaf area was measured using imageJ (Schneider et al. 2012). The same leaves were weighed and specific leaf area (SLA) calculated. Additionally, for each focal individual, the Photosynq multispeQ (East Lansing Michigan, USA) portable flurometer and spectrophotometer (Kuhlgert et al. 2016) was used to measure relative chlorophyll content, leaf surface temperature, photosynthetically active solar radiation (PAR) in the vicinity of the leaf, various metrics of light absorbance and photosynthesis by the leaf, and ambient weather conditions (e.g., humidity; Table 1). In addition, to characterize and account for spatial relatedness among sampling locations during modeling, distance-based Moran's eigenvector maps (MEM) were calculated at the



site level using the `dbmem` function of the `adespatial` R package (Dray et al. 2016). The geodesic distance between sites was used to generate a distance matrix, which was decomposed using `dbmem`, and the top two MEMs included in all models.

### *Epiphyte removal*

We removed epiphytes via washing leaves using detergent and water (see main text). Evidence for the success of this procedure includes the number of taxa that were observed within epiphyte samples that did not appear in endophyte samples (Fig. 3). Additionally, a subset of leaves ( $n = 84$ ) were washed twice and the solution from the second rinse sequenced. On average, slightly fewer sequencing reads were obtained from secondary rinses than primary rinses and ordinations showed that rewashed samples were different than washed samples for bacteria (Fig. S1–S4). Fungal ordinations showed a general overlap of rewashed samples with both epiphyte and endophyte samples, suggesting that fungi did not differ as much among compartments as did bacteria, possibly because fungi were harder to wash off or because they grew both within and without leaves (see main text).

### *Library preparation details*

DNA was extracted using Qiagen DNEasy plant kits (plate format). Libraries were prepared using a two-step procedure described in Harrison et al. (2021a). For bacteria, the 16S (V4) locus was amplified using the 515-806 primer pair (Wang and Qian 2009), while for fungi the ITS1 locus was amplified using the ITS1f-ITS2 primer pair (White et al. 1990). We used shortened variants of the molecules presented in (Tourlousse et al. 2017) as internal standards (see Harrison et al. 2021a, for details). To account for cross-contamination, short synthetic sequences were added to each well of the 96-well plates used during library preparation. By tracking these known sequences, we were able to identify instances of cross-contamination and remove those samples from analysis (see Harrison et al. 2021a). We added an equimolar amount ( $\sim 0.18$  pg, which translates into  $\sim 209$ – $215$  million molecules depending on the ISD; we had an ISD for each locus) of a synthetic DNA internal standard (ISD) to each sample prior to PCR. ISDs were inspired by (Tourlousse et al. 2017) and consisted of synthetic DNA (matching no known organisms) that was placed in between primer sequences.

Libraries were created using duplicate PCR reactions consisting of  $6 \mu\text{l}$  of  $0.01 \text{ pg } \mu\text{L}^{-1}$  coligos and  $0.03 \text{ pg } \mu\text{L}^{-1}$  of the ISD and  $30 \mu\text{l}$  of template. Template was normalized to  $10 \text{ ng } \mu\text{L}^{-1}$ .  $6 \mu\text{l}$  each of  $0.25 \mu\text{M}$  forward and reverse primers,  $0.3 \mu\text{l}$  Kapa HiFi HotStart DNA polymerase (New England BioLabs, Ipswich, MA, U.S.A.),  $0.45 \mu\text{l}$   $10 \text{ M}$  dNTPs,  $3 \mu\text{l}$   $5\times$  KAPA HiFi HotStart PCR buffer (New England BioLabs, Ipswich, MA, U.S.A.),  $3.25 \mu\text{l}$  of water, and  $2 \mu\text{l}$  of template were mixed and used for the first round of PCR. The PCR recipe was: denaturation at  $95^\circ\text{C}$  for 3 min, followed by 15 cycles of  $98^\circ\text{C}$  for 30 s,  $62^\circ\text{C}$  for 30 s, and  $72^\circ\text{C}$  for 30 s, and a final 5 min extension at  $72^\circ\text{C}$ . Amplicons were cleaned using Axygen AxyPrep MagBead ( $24 \mu\text{l}$ ; Corning; Glendale, Arizona, U.S.A.). Reaction volume for the second round of PCR was  $15 \mu\text{l}$ .  $0.5 \mu\text{l}$  each of  $10 \mu\text{M}$  flowcell primers,  $0.3 \mu\text{l}$  Kapa HiFi HotStart DNA polymerase,  $0.45 \mu\text{l}$   $10 \text{ M}$  dNTPs,  $3 \mu\text{l}$   $5\times$  KAPA HiFi HotStart PCR buffer,  $0.75 \mu\text{l}$  of water, and  $10 \mu\text{l}$  of cleaned product from the first round of PCR were mixed for the

second round of PCR. Denaturation at 95°C for 3 min, was followed by 19 cycles of 98°C for 30 s, 55°C for 30 s, and 72°C for 30 s, and a final 5 min extension at 72°C. Products were again cleaned using magnetic beads, normalized, pooled, and sent off for sequencing by psomagen, Inc. (Rockville, MA, U.S.A.). Library success was determined via qPCR and by using a Bio-Analyzer (Agilent, Santa Clara, CA, U.S.A). Aside from sequencing, all laboratory work was conducted at the Genome Technologies Laboratory at the University of Wyoming (Laramie, WY, U.S.A.).

Since each PCR replicate was tagged with a unique molecular identifier, we were able to compare replicates. Sequence counts for PCR replicates were highly correlated and so were combined in downstream analyses.

### *0.1 Bioinformatics*

Paired-end sequences were merged using `vsearch` v2.9.0 (Rognes et al. 2016). Some ITS reads did not overlap and thus were trimmed to a fixed length and concatenated. Reads with more than a single possible error were removed. Exact sequence variants (ESVs) were determined via `vsearch` and then these variants clustered by 97% similarity. We decided to combine ESVs in this way because we recovered many tens of thousands of ESVs and treating each of these ESVs individually was unwieldy. The large number of ESVs we recovered was at least partially due to the extreme sequence depth possible with the NovaSeq and the patterned flow cell of this machine may also have contributed (Singer et al. 2019). Taxonomic hypotheses were generated using the SINTAX algorithm (Edgar 2016) and the UNITE (for ITS; v7.2; Community 2017) and Greengenes (for 16S; v13.5; DeSantis et al. 2006) databases.

### *Modeling estimated proportion data*

Division by the ISD cannot estimate the probability that a zero is biological or due to low sequencing depth; therefore, a zero before normalization is a zero afterwards. To circumvent this issue we also attempted to model all data using a hierarchical Bayesian model that shares information among replicates within a sampling group (in our case, a sampling group was a host taxon and compartment at a site) to estimate the probability of observing a taxon in each sample; overall results were similar to those presented here for models of individual taxon abundances and diversity (see the Supplemental Material; Harrison et al. 2020b; Harrison et al. 2020a).

We also modeled count data using a hierarchical Bayesian approach implemented via the CNVRG R package (v. 1.0.0; Harrison et al. 2020b). This method estimates taxon proportions within a sample as parameters of a multinomial distribution with a Dirichlet prior, which is used to share information among samples within treatment groups (Harrison et al. 2020a). Treatment groups were the combination of host taxon and compartment at individual sites. For example, we shared information among the ten EN samples from a particular plant taxon at a location. The benefit of the CNVRG approach is the information sharing among samples within a treatment group and the ability to pass uncertainty in microbial abundances to downstream analyses. Our rationale was that sharing of information could be useful for estimating the probability of observing rare taxa when there was extreme variation

in sequencing depth among samples. This style of modeling, since it relies on proportional data, avoids the issues imposed by rarefaction.

When using proportional abundances extracted from our hierarchical Bayesian approach in our random forest, model performance was generally poor for fungi, with  $R^2$  exceeding 1% for only 8 fungi. All 23 bacteria had model  $R^2$  of between 5–9%. The similarity among bacteria likely is due to the constraints imposed by prior structure of the hierarchical model, given the relatively low read count for many bacterial taxa in many samples.

## 0.2 Machine learning details

We used a rigorous approach to model fitting, tuning, and performance determination that was reliant upon the `mlr3` R package (v 0.12.0; Lang et al. 2019). `mlr3` provides an interface to assist with the considerable programmatic bookkeeping needed to run many thousands of models using different parameters and datasets. Our general approach was to split the data into many testing and training datasets, then train the model on those data, tune the hyper-parameters of the model and then assess model performance. Imputation was done within each sub-dataset, as was hyper-parameter tuning, thus avoiding information from the training data leaking into the testing data.

Feature engineering included conversion of categorical covariate data to numeric data via one-hot encoding, imputation of missing data, and scaling and centering data (conversion to z scores). Features were built to stratify data during splitting into testing and training sets to ensure similarity between both datasets. For example, a feature describing if a focal taxon was above its median abundance in a sample was used to ensure that neither the testing nor the training data were under-representative of the focal taxon’s variation in abundance. Plant compartment (either EP or EN) was also used during stratification, because *a priori* analysis suggested it was an important determinant of microbiome composition.

Correlation of features was examined and one of a group of highly correlated features were included in models (e.g., elevation was included but not atmospheric pressure; Fig. S5). The exception to this were several features that were correlated with elevation, such as mean temperature and tree and shrub species richness within sampling plots. These features were retained since they varied among lower elevation sites and because they were of general interest to us.

Hyper-parameter tuning was performed using the “AutoTuner” function of `mlr3` using the hyperband tuning algorithm (Li et al. 2017), which adaptively allocates compute resources to better explore higher performing portions of parameter space. Hyper-parameters considered during tuning were the number of trees in the ensemble (50–400), the fraction of the samples used for each tree (0.01–0.3), the minimum node size (1–25; meaning how many samples are retained in the “leaves” of the trees), and the splitting rule used for designating splits in decision trees. Both the “extratrees” and “variance” split rules were considered. The former institutes the “extremely randomized trees” approach of Geurts et al. (2006), where splits in the trees are assigned randomly. The “variance” splitting rule determines splits such that variance in the response is minimized within each group delineated by the split and trees are built using subsets of the data. A nested resampling approach (using `mlr3`; three outer splits and four inner splits) was used to determine an unbiased estimate of model performance.

### 0.3 Supplemental results and discussion

Our poor results likely *overestimate* our ability to predict microbiome composition. This is because much of our sequencing data was composed of extremely rare genetic material that was removed during the bioinformatics prior to modeling. Between both loci surveyed, over 500,000 unique sequences were obtained, most of which were discarded during filtering (a process referred to as “denoising”, a standard step to remove possible technically-derived variants). While it is reasonable to assume a subset of these unique sequences were artifacts of PCR, it seems certain that some were biologically-derived. Unfortunately, current technology precludes accurate provenance determination of infrequent sequences, consequently the current standard is to discard these data.

Because we used the Novaseq platform, which improves upon older Illumina technology through the use of a patterned flow cell that can better distinguish between clusters during sequencing-by-synthesis, we may have obtained sequences from more rare taxa than is typical (a possibility suggested in Singer et al. 2019). However, the rank abundance curves that we observed for our data generally match those reported in the literature—with few abundant taxa and many rare taxa (Figs. S31 & S32). Indeed, this pattern is ubiquitous in ecology (Hubbell 2001), though perhaps microbial assemblages tend to have a longer tail of rare taxa than do macrobial assemblages (Locey and Lennon 2016).

There was an interesting disparity in overall abundance between bacteria and fungi when moving between plant compartments. Bacteria tended to be more abundant on the surfaces of leaves compared to their interiors, but the opposite was true for fungi (an inference that was made possible through the use of an internal standard). This result affords ample opportunity for speculation regarding mechanism. Perhaps fungi can better survive the plant’s immune system than bacteria or perhaps the result is because some fungi possess better tools, such as appressoria, to make their way into leaves. More simply, perhaps fungi have a harder time growing on the surface of the leaf than do bacteria. We suggest that culturing studies that simulate growth inside versus outside of a leaf (e.g., by varying ultraviolet light exposure, diel cycles in abiotic conditions, and nutrient availability) could provide insight into our results.

We also found that leaf area and Moran’s eigenvector maps were influential features in our models, as might be expected if dispersal was important (though, of course, these same features are confounded with potentially important variation in the foliar habitat), yet these features collectively explained only a small proportion of microbiome variation. If dispersal and priority effects are key to understanding patterns of variation among microbial taxa then this adds impetus to the study of dispersal rates and distances, taxon-specific propagule counts, and spore persistence among microbes, as without this basic natural history knowledge parameterizing theory will not be possible (i.e., island biogeographic theory).

We do not think that problems with the ISD itself caused the failure of our absolute abundance models because models were taxon-specific and samples that did not include the ISD (for instance, due to poor sequencing) were omitted from analysis. That is, variation in a single microbial taxon was modeled after dividing the sequence counts for that taxon by the counts for the ISD—thus, stated colloquially, models compared apples to apples. This approach was necessary because inter-taxon comparisons are not reliable due to copy-number variation (CNV) and likely differences among taxa in ISD commutability, which describes

the similarity in behaviour between the ISD and a particular taxon during extraction and PCR (Harrison et al. 2021c). CNV could vary among samples for a single microbial taxon, but this should have influenced both relative and absolute abundances similarly and thus seems unlikely to be the primary reason absolute abundance models performed so badly when co-occurring microbes were not included as features. We note that without an ISD we would not have trusted the results from models that included co-occurring microbes as features, because of the spectre of compositionality.

Table S1: Number of times a feature was in the top ten most important for models of fungal *abundance* (ISD standardized) at the landscape level and which had an  $R^2 > 0.01$ . Only the top fifteen most important features are shown. 57 taxa out of 172 that met our modeling requirements were predictable.

---

| Feature             | Num. of times in top ten most important. |
|---------------------|------------------------------------------|
| Shannon's flora     | 23                                       |
| Mean temp. April    | 23                                       |
| Light intensity PAR | 22                                       |
| Sla                 | 21                                       |
| Shrub richness      | 20                                       |
| Habit:forb          | 20                                       |
| Elevation           | 19                                       |
| Ambient humidity    | 19                                       |
| MEM2                | 18                                       |
| Ambient temperature | 18                                       |
| Height of sample    | 17                                       |
| Precip. in April    | 16                                       |
| LEF                 | 15                                       |
| Julian date         | 15                                       |
| Fs                  | 15                                       |

---



Table S2: Number of times a feature was in the top ten most important for models of fungal *relative abundance* (Hellinger standardized) at the landscape level and which had an  $R^2 > 0.01$ . Only the fifteen most important features are shown. 155 taxa out of 172 that met our modeling requirements were predictable.

---

| Feature             | Num. of times in top ten most important. |
|---------------------|------------------------------------------|
| Height of sample    | 94                                       |
| Elevation           | 81                                       |
| Leaf area           | 73                                       |
| Sla                 | 72                                       |
| Julian date         | 63                                       |
| Longitude           | 60                                       |
| Latitude            | 55                                       |
| Precip. in April    | 53                                       |
| Habit:tree          | 53                                       |
| Shannon's flora     | 52                                       |
| Shrub richness      | 51                                       |
| MEM2                | 51                                       |
| Mean temp. April    | 50                                       |
| Plant volume        | 49                                       |
| Ambient temperature | 45                                       |

---

Table S3: Number of times a feature was in the top ten most important for models of fungal *occurrence* with an MCC of 0.2 or greater. Only the fifteen most important features are shown. 39 taxa out of 172 that met our modeling requirements were predictable.

| Feature          | Num. of times in top ten most important. |
|------------------|------------------------------------------|
| Height of sample | 41                                       |
| Leaf area        | 40                                       |
| Sla              | 37                                       |
| Elevation        | 35                                       |
| Plant volume     | 25                                       |
| Mean temp. April | 25                                       |
| Longitude        | 25                                       |
| MEM2             | 20                                       |
| Latitude         | 19                                       |
| Julian date      | 19                                       |
| Shrub richness   | 16                                       |
| Ambient humidity | 16                                       |
| Precip. in April | 15                                       |
| Dead and down    | 15                                       |
| Shannon's flora  | 14                                       |

Table S4: Features ranked by the number of times they were in the top ten most influential for only those models of relative abundances that had an  $R^2 > 0.25$ . Models for fifteen fungal taxa had such high  $R^2$  values and 12 of those taxa were hypothesized to be within Ascomycota. The other three taxa were not placed within a phylum via a SINTAX query of the UNITE database (see main text). Only the top 20 features are shown. Notably, no single fungal taxon was predictable at an  $R^2 > 0.25$  when using ISD transformed data (absolute abundance) without including co-occurring microbes.

---

| Feature                      | Num. of times in top ten most important. |
|------------------------------|------------------------------------------|
| Shannon's flora              | 3                                        |
| Ambient temperature          | 4                                        |
| Taxon: <i>Pinus contorta</i> | 4                                        |
| Densitometer                 | 5                                        |
| Habit:tree                   | 5                                        |
| MEM1                         | 5                                        |
| Slope perc.                  | 5                                        |
| Leaf area                    | 6                                        |
| Height of sample             | 7                                        |
| Tree richness                | 7                                        |
| Longitude                    | 8                                        |
| Sla                          | 8                                        |
| Dead and down                | 9                                        |
| MEM2                         | 9                                        |
| Precip. in April             | 9                                        |
| Latitude                     | 10                                       |
| Mean temp. April             | 10                                       |
| Julian date                  | 11                                       |
| elevation                    | 12                                       |
| Shrub richness               | 12                                       |

Table S7: Number of times a feature was in the top ten most important for models of fungal *abundance* (ISD standardized) that were limited to a single host taxon and which had an  $R^2 > 0.01$ . Only the fifteen most important features are shown. Models were successful for 16 out of 110 combinations of host and microbial taxon.

---

| Feature                    | Num. of times in top ten most important. |
|----------------------------|------------------------------------------|
| Rel. chlorophyll intensity | 13                                       |
| Compartment: EN            | 13                                       |
| Phenology: fruiting        | 12                                       |
| Tree richness              | 11                                       |
| SPAD 420 intensity         | 11                                       |
| Phenology: vegetative      | 11                                       |
| Leaves extracted           | 11                                       |
| Densitometer               | 9                                        |
| Slope perc.                | 7                                        |
| gH.                        | 7                                        |
| Absorbance 940             | 5                                        |
| Latitude                   | 4                                        |
| Height of sample           | 4                                        |
| Shrub richness             | 3                                        |
| Julian date                | 3                                        |

---

Table S5: The most important bacterial taxa for models that included bacteria as features. Taxonomic hypotheses were generated using the Greengenes database. The numbers in parentheses are the proportion estimates for how certain the taxon was correctly identified, as output by SINTAX. Otu name is presented (i.e., Zotu 207) to aid in searching for the OTU in sequencing data. Abundances shown are ISD normalized data.

| Otu       | Taxonomic hypothesis                                                                                              | median abund. | mean abund. | max. abund. |
|-----------|-------------------------------------------------------------------------------------------------------------------|---------------|-------------|-------------|
| Zotu 202  | Acidobacteria(1.00), Chloracidobacteria[1.00], RB41(1.00)                                                         | 0.02          | 0.06        | 2.00        |
| Zotu 407  | Actinobacteria(1.00), Actinobacteria(1.00), Actinomycetales(1.00), FPseudonocardiales(0.99), Pseudonocardia(0.99) | 0.02          | 0.06        | 1.11        |
| Zotu 447  | Proteobacteria(1.00), Betaproteobacteria(1.00), Burkholderiales(1.00), Oxalobacteraceae(1.00), Ralstonia(1.00)    | 0.03          | 0.09        | 14.00       |
| Zotu 385  | AD3(0.99), ABS-6(0.99)                                                                                            | 0.02          | 0.06        | 2.64        |
| Zotu 1290 | Bacteroidetes(1.00), Sphingobacteriia(1.00), Sphingobacteriales(1.00), Sphingobacteriaceae(1.00)                  | 0.02          | 0.06        | 3.00        |
| Zotu 1326 | Proteobacteria(1.00), Alphaproteobacteria(1.00), Rhodospirillales(1.00), Acetobacteraceae(1.00)                   | 0.02          | 0.07        | 10.03       |
| Zotu 828  | Chloroflexi(1.00), Ellin6529(1.00)                                                                                | 0.02          | 0.06        | 1.13        |
| Zotu 1636 | Proteobacteria(1.00), Alphaproteobacteria(1.00), Rhodospirillales(1.00), Acetobacteraceae(1.00)                   | 0.02          | 0.07        | 4.00        |
| Zotu 4430 | Actinobacteria(1.00), Rubrobacteria(1.00), Rubrobacteriales(1.00), Rubrobacteraceae(1.00), Rubrobacter(1.00)      | 0.01          | 0.07        | 20.76       |
| Zotu 895  | Verrucomicrobia(1.00), Spartobacteria(1.00), Chthoniobacteriales(1.00), Chthoniobacteraceae(1.00), DA101(1.00)    | 0.02          | 0.06        | 1.00        |

Table S6: The most important fungal taxa for models that included fungi as features. Taxonomic hypotheses were generated using the UNITE database. The numbers in parentheses are the proportion estimates for how certain the taxon was correctly identified, as output by SINTAX. Otu name is presented (i.e., Zotu 207) to aid in searching for the OTU in sequencing data. Abundances shown are ISD normalized data.

| Otu       | Taxonomic hypothesis                                                                                                  | median abund. | mean abund. | max. abund. |
|-----------|-----------------------------------------------------------------------------------------------------------------------|---------------|-------------|-------------|
| Zotu 207  | Ascomycota(0.62), Dothideomycetes(0.62), Myriangiales(0.62)                                                           | 0.00          | 0.02        | 3.50        |
| Zotu 5973 | Unknown                                                                                                               | 0.00          | 0.01        | 3.46        |
| Zotu 3526 | Unknown                                                                                                               | 0.00          | 0.02        | 5.83        |
| Zotu 1136 | Unknown                                                                                                               | 0.00          | 0.01        | 6.33        |
| Zotu 7009 | Unknown                                                                                                               | 0.00          | 0.01        | 1.81        |
| Zotu 140  | Basidiomycota(0.43), Tremellomycetes(0.43), Holtermanniales(0.43), Holtermanniella_takashimae_SH1610809.08FU(0.43)    | 0.00          | 0.03        | 6.80        |
| Zotu 446  | Ascomycota(0.99), Taphrinomycetes(0.99), Taphrinales(0.84),f:Taphrinaceae(0.84), Taphrina_carnea_SH1519948.08FU(0.70) | 0.00          | 0.03        | 19.42       |
| Zotu 4070 | Basidiomycota(1.00), Tremellomycetes(1.00)                                                                            | 0.00          | 0.01        | 1.31        |
| Zotu 1067 | Ascomycota(0.37), Leotiomycetes(0.28), Helotiales(0.28), Dermateaceae(0.27)                                           | 0.00          | 0.01        | 1.00        |
| Zotu 91   | Ascomycota(1.00), Dothideomycetes(1.00), Myriangiales(1.00)                                                           | 0.00          | 0.02        | 4.19        |



Table S8: Number of times a feature was in the top ten most important for models of fungal *relative abundance* (Hellinger transformed) that were limited to a single host taxon and which had an  $R^2 > 0.01$ . Only the fifteen most important features are shown. Models were successful for 66 out of 110 combinations of host and microbial taxon.

---

| Feature                    | Num. of times in top ten most important. |
|----------------------------|------------------------------------------|
| SPAD 420 intensity         | 63                                       |
| Rel. chlorophyll intensity | 59                                       |
| Compartment: EN            | 57                                       |
| Phenology: vegetative      | 55                                       |
| Densitometer               | 55                                       |
| Phenology: fruiting        | 54                                       |
| gH.                        | 54                                       |
| Tree richness              | 53                                       |
| Shrub richness             | 53                                       |
| Leaves extracted           | 41                                       |
| Slope perc.                | 25                                       |
| MEM1                       | 8                                        |
| Julian date                | 8                                        |
| Dead and down              | 8                                        |
| Phenology: flowering       | 7                                        |

---

Table S9: Number of times a feature was in the top ten most important for models of fungal *occupancy* that were limited to a single host taxon and that had an MCC greater than 0.2. The fifteen most important features are shown. Models were successful for 81 out of 110 combinations of host and microbial taxon.

| Feature                    | Num. of times in top ten most important. |
|----------------------------|------------------------------------------|
| SPAD 420 intensity         | 42                                       |
| Compartment: EN            | 42                                       |
| Tree richness              | 40                                       |
| Rel. chlorophyll intensity | 38                                       |
| gH.                        | 38                                       |
| Phenology: vegetative      | 37                                       |
| Densitometer               | 37                                       |
| Shrub richness             | 36                                       |
| Phenology: fruiting        | 33                                       |
| Leaves extracted           | 26                                       |
| Slope perc.                | 16                                       |
| Phenology: flowering       | 6                                        |
| Julian date                | 6                                        |
| Plant volume               | 4                                        |
| Dead and down              | 4                                        |

Table S10: Differences in estimated fungal Shannon's diversity by compartment and host growth habit. EN refers to endophytes and EP refers to epiphytes. The estimated difference in diversity is shown with 95% confidence intervals and a p value adjusted for multiple comparisons.

| Comparison           | diff   | lwr     | upr    | p adj |
|----------------------|--------|---------|--------|-------|
| EN graminoid-EN forb | 17.43  | -371.38 | 406.25 | 1.00  |
| EN shrub-EN forb     | -83.72 | -314.04 | 146.61 | 0.96  |

|                           |         |         |         |      |
|---------------------------|---------|---------|---------|------|
| EN tree-EN forb           | -273.27 | -511.74 | -34.79  | 0.01 |
| EP forb-EN forb           | 383.26  | 195.33  | 571.18  | 0.00 |
| EP graminoid-EN forb      | 380.05  | -4.34   | 764.44  | 0.06 |
| EP shrub-EN forb          | 150.86  | -78.93  | 380.66  | 0.49 |
| EP tree-EN forb           | 116.34  | -128.20 | 360.87  | 0.84 |
| EN shrub-EN graminoid     | -101.15 | -512.03 | 309.73  | 1.00 |
| EN tree-EN graminoid      | -290.70 | -706.21 | 124.80  | 0.40 |
| EP forb-EN graminoid      | 365.82  | -22.88  | 754.52  | 0.08 |
| EP graminoid-EN graminoid | 362.62  | -150.73 | 875.97  | 0.39 |
| EP shrub-EN graminoid     | 133.43  | -277.15 | 544.01  | 0.98 |
| EP tree-EN graminoid      | 98.90   | -320.11 | 517.91  | 1.00 |
| EN tree-EN shrub          | -189.55 | -462.52 | 83.42   | 0.41 |
| EP forb-EN shrub          | 466.97  | 236.85  | 697.10  | 0.00 |
| EP graminoid-EN shrub     | 463.77  | 57.07   | 870.46  | 0.01 |
| EP shrub-EN shrub         | 234.58  | -30.84  | 500.00  | 0.13 |
| EP tree-EN shrub          | 200.05  | -78.23  | 478.33  | 0.36 |
| EP forb-EN tree           | 656.53  | 418.24  | 894.81  | 0.00 |
| EP graminoid-EN tree      | 653.32  | 241.96  | 1064.68 | 0.00 |
| EP shrub-EN tree          | 424.13  | 151.61  | 696.65  | 0.00 |
| EP tree-EN tree           | 389.60  | 104.54  | 674.66  | 0.00 |
| EP graminoid-EP forb      | -3.21   | -387.48 | 381.07  | 1.00 |

|                          |         |         |        |      |
|--------------------------|---------|---------|--------|------|
| EP shrub-EP forb         | -232.39 | -461.99 | -2.80  | 0.04 |
| EP tree-EP forb          | -266.92 | -511.27 | -22.58 | 0.02 |
| EP shrub-EP<br>graminoid | -229.19 | -635.58 | 177.21 | 0.68 |
| EP tree-EP<br>graminoid  | -263.72 | -678.62 | 151.19 | 0.53 |
| EP tree-EP shrub         | -34.53  | -312.37 | 243.31 | 1.00 |

Table S11: Differences in estimated bacterial Shannon's diversity by compartment and host growth habit. EN refers to endophytes and EP refers to epiphytes. The estimated difference in diversity is shown with 95% confidence intervals and a p value adjusted for multiple comparisons.

| Comparison                   | diff   | lwr     | upr    | p adj |
|------------------------------|--------|---------|--------|-------|
| EN graminoid-EN<br>forb      | 38.43  | -60.14  | 137.00 | 0.94  |
| EN shrub-EN forb             | 11.21  | -47.09  | 69.51  | 1.00  |
| EN tree-EN forb              | -15.59 | -75.79  | 44.60  | 0.99  |
| EP forb-EN forb              | 7.37   | -39.82  | 54.57  | 1.00  |
| EP graminoid-EN<br>forb      | -15.29 | -112.12 | 81.55  | 1.00  |
| EP shrub-EN forb             | -18.55 | -76.31  | 39.20  | 0.98  |
| EP tree-EN forb              | -7.85  | -69.43  | 53.73  | 1.00  |
| EN shrub-EN<br>graminoid     | -27.22 | -131.32 | 76.89  | 0.99  |
| EN tree-EN<br>graminoid      | -54.02 | -159.20 | 51.16  | 0.78  |
| EP forb-EN<br>graminoid      | -31.05 | -129.37 | 67.26  | 0.98  |
| EP graminoid-EN<br>graminoid | -53.72 | -183.39 | 75.96  | 0.91  |

|                          |        |         |        |      |
|--------------------------|--------|---------|--------|------|
| EP shrub-EN<br>graminoid | -56.98 | -160.78 | 46.82  | 0.71 |
| EP tree-EN<br>graminoid  | -46.28 | -152.25 | 59.70  | 0.89 |
| EN tree-EN shrub         | -26.80 | -95.69  | 42.08  | 0.94 |
| EP forb-EN shrub         | -3.84  | -61.71  | 54.04  | 1.00 |
| EP graminoid-EN<br>shrub | -26.50 | -128.96 | 75.97  | 0.99 |
| EP shrub-EN<br>shrub     | -29.76 | -96.53  | 37.00  | 0.88 |
| EP tree-EN shrub         | -19.06 | -89.16  | 51.04  | 0.99 |
| EP forb-EN tree          | 22.97  | -36.81  | 82.75  | 0.94 |
| EP graminoid-EN<br>tree  | 0.30   | -103.25 | 103.86 | 1.00 |
| EP shrub-EN tree         | -2.96  | -71.38  | 65.46  | 1.00 |
| EP tree-EN tree          | 7.74   | -63.94  | 79.42  | 1.00 |
| EP graminoid-EP<br>forb  | -22.66 | -119.24 | 73.92  | 1.00 |
| EP shrub-EP forb         | -25.93 | -83.25  | 31.40  | 0.87 |
| EP tree-EP forb          | -15.22 | -76.40  | 45.95  | 1.00 |
| EP shrub-EP<br>graminoid | -3.26  | -105.42 | 98.89  | 1.00 |
| EP tree-EP<br>graminoid  | 7.44   | -96.93  | 111.80 | 1.00 |
| EP tree-EP shrub         | 10.70  | -58.94  | 80.34  | 1.00 |

Table S12: Differences in estimated bacterial richness by compartment and host growth habit. EN refers to endophytes and EP refers to epiphytes. The estimated difference in richness is shown with 95% confidence intervals and a p value adjusted for multiple comparisons. The random forest model for 16s richness was not successful ( $R^2 \sim 0$ ).

| Comparison                   | Diff. | Lower bound | Upper bound | Adj. p |
|------------------------------|-------|-------------|-------------|--------|
| forb EP-forb EN              | 0.76  | 0.37        | 1.15        | 0.00   |
| graminoid<br>EN-forb EN      | -0.46 | -1.31       | 0.40        | 0.74   |
| graminoid EP-forb<br>EN      | 0.74  | -0.00       | 1.48        | 0.05   |
| shrub EN-forb EN             | 0.14  | -0.36       | 0.63        | 0.99   |
| shrub EP-forb EN             | 0.82  | 0.37        | 1.28        | 0.00   |
| tree EN-forb EN              | 0.18  | -0.31       | 0.67        | 0.96   |
| tree EP-forb EN              | 0.74  | 0.26        | 1.23        | 0.00   |
| graminoid<br>EN-forb EP      | -1.22 | -2.06       | -0.38       | 0.00   |
| graminoid EP-forb<br>EP      | -0.02 | -0.75       | 0.71        | 1.00   |
| shrub EN-forb EP             | -0.62 | -1.10       | -0.15       | 0.00   |
| shrub EP-forb EP             | 0.07  | -0.36       | 0.49        | 1.00   |
| tree EN-forb EP              | -0.58 | -1.05       | -0.12       | 0.00   |
| tree EP-forb EP              | -0.02 | -0.48       | 0.44        | 1.00   |
| graminoid<br>EP-graminoid EN | 1.20  | 0.15        | 2.25        | 0.01   |
| shrub<br>EN-graminoid EN     | 0.59  | -0.30       | 1.48        | 0.48   |
| shrub<br>EP-graminoid EN     | 1.28  | 0.41        | 2.15        | 0.00   |
| tree EN-graminoid<br>EN      | 0.63  | -0.26       | 1.52        | 0.38   |
| tree EP-graminoid<br>EN      | 1.20  | 0.31        | 2.09        | 0.00   |
| shrub<br>EN-graminoid EP     | -0.61 | -1.40       | 0.18        | 0.28   |



|                      |       |       |       |      |
|----------------------|-------|-------|-------|------|
| shrub                | 0.08  | -0.68 | 0.85  | 1.00 |
| EP-graminoid EP      |       |       |       |      |
| tree EN-graminoid EP | -0.56 | -1.35 | 0.22  | 0.37 |
| tree EP-graminoid EP | 0.00  | -0.78 | 0.79  | 1.00 |
| shrub EP-shrub EN    | 0.69  | 0.16  | 1.22  | 0.00 |
| tree EN-shrub EN     | 0.04  | -0.52 | 0.60  | 1.00 |
| tree EP-shrub EN     | 0.61  | 0.05  | 1.16  | 0.02 |
| tree EN-shrub EP     | -0.65 | -1.17 | -0.12 | 0.00 |
| tree EP-shrub EP     | -0.08 | -0.60 | 0.44  | 1.00 |
| tree EP-tree EN      | 0.57  | 0.01  | 1.12  | 0.04 |

Table S13: Differences in estimated fungal richness by compartment and host growth habit. EN refers to endophytes and EP refers to epiphytes. The estimated difference in richness is shown with 95% confidence intervals and a p value adjusted for multiple comparisons. The random forest model for 16s richness was not successful ( $R^2 \sim 0$ ).

| Comparison           | Diff. | Lower bound | Upper bound | Adj. p |
|----------------------|-------|-------------|-------------|--------|
| forb EP-forb EN      | -0.36 | -0.65       | -0.07       | 0.00   |
| graminoid EN-forb EN | -0.40 | -0.99       | 0.18        | 0.41   |
| graminoid EP-forb EN | -0.23 | -0.81       | 0.36        | 0.94   |
| shrub EN-forb EN     | 0.02  | -0.32       | 0.36        | 1.00   |
| shrub EP-forb EN     | 0.02  | -0.32       | 0.36        | 1.00   |
| tree EN-forb EN      | 0.07  | -0.29       | 0.43        | 1.00   |
| tree EP-forb EN      | 0.19  | -0.18       | 0.56        | 0.75   |
| graminoid EN-forb EP | -0.04 | -0.63       | 0.54        | 1.00   |

|                              |       |       |      |      |
|------------------------------|-------|-------|------|------|
| graminoid EP-forb<br>EP      | 0.13  | -0.45 | 0.72 | 1.00 |
| shrub EN-forb EP             | 0.38  | 0.04  | 0.73 | 0.01 |
| shrub EP-forb EP             | 0.38  | 0.04  | 0.72 | 0.02 |
| tree EN-forb EP              | 0.43  | 0.07  | 0.79 | 0.01 |
| tree EP-forb EP              | 0.55  | 0.18  | 0.93 | 0.00 |
| graminoid<br>EP-graminoid EN | 0.18  | -0.60 | 0.95 | 1.00 |
| shrub<br>EN-graminoid EN     | 0.43  | -0.18 | 1.04 | 0.40 |
| shrub<br>EP-graminoid EN     | 0.42  | -0.19 | 1.03 | 0.43 |
| tree EN-graminoid<br>EN      | 0.47  | -0.15 | 1.09 | 0.29 |
| tree EP-graminoid<br>EN      | 0.60  | -0.03 | 1.23 | 0.08 |
| shrub<br>EN-graminoid EP     | 0.25  | -0.36 | 0.86 | 0.92 |
| shrub<br>EP-graminoid EP     | 0.24  | -0.37 | 0.86 | 0.93 |
| tree EN-graminoid<br>EP      | 0.30  | -0.33 | 0.92 | 0.83 |
| tree EP-graminoid<br>EP      | 0.42  | -0.21 | 1.05 | 0.46 |
| shrub EP-shrub<br>EN         | -0.01 | -0.40 | 0.38 | 1.00 |
| tree EN-shrub EN             | 0.05  | -0.36 | 0.45 | 1.00 |
| tree EP-shrub EN             | 0.17  | -0.24 | 0.58 | 0.92 |
| tree EN-shrub EP             | 0.05  | -0.35 | 0.46 | 1.00 |
| tree EP-shrub EP             | 0.18  | -0.24 | 0.59 | 0.90 |
| tree EP-tree EN              | 0.12  | -0.30 | 0.55 | 0.99 |

---

Table S14: Median fungal epiphyte richness of host plants. Only the top 20 most rich are shown.

| Host taxon             | Median richness | Habit     |
|------------------------|-----------------|-----------|
| Unknown fir            | 40.48           | tree      |
| Wyethia amplexicaulis  | 41.71           | forb      |
| Arnica cordifolia      | 44.00           | forb      |
| Potentilla pulcherrima | 44.59           | forb      |
| Abies concolor         | 47.95           | tree      |
| Picea engelmannii      | 48.80           | tree      |
| Helianthella uniflora  | 53.11           | forb      |
| Symphoricarpos albus   | 53.65           | shrub     |
| Pseudotsuga menziesii  | 54.34           | tree      |
| Unknown Spruce         | 56.14           | tree      |
| Ribes montigenum       | 61.44           | shrub     |
| Sedum lanceolatum      | 62.49           | forb      |
| Eriogonum umbellatum   | 62.95           | forb      |
| Minuartia obtusiloba   | 73.93           | forb      |
| Abies grandis          | 76.98           | tree      |
| Juniperus communis     | 77.00           | shrub     |
| Poa wheeleri           | 82.10           | graminoid |
| Vaccinium membranaceum | 88.62           | shrub     |
| Pinus contorta         | 123.15          | tree      |
| Paxistima myrsinites   | 212.51          | shrub     |

Table S15: Median fungal endophyte richness of host plants. Only top 20 most rich host taxa shown.

| Host taxon                    | Median richness | Habit     |
|-------------------------------|-----------------|-----------|
| <i>Symphoricarpos albus</i>   | 42.38           | shrub     |
| <i>Vaccinium scoparium</i>    | 42.51           | shrub     |
| <i>Ribes montigenum</i>       | 43.73           | shrub     |
| <i>Sedum lanceolatum</i>      | 46.32           | forb      |
| <i>Heracleum maximum</i>      | 46.55           | forb      |
| Unknown fir                   | 48.45           | tree      |
| <i>Fragaria virginiana</i>    | 49.56           | forb      |
| <i>Pinus contorta</i>         | 56.62           | tree      |
| <i>Pseudotsuga menziesii</i>  | 60.44           | tree      |
| <i>Eriogonum umbellatum</i>   | 61.35           | forb      |
| <i>Astragalus kentrophyta</i> | 63.22           | forb      |
| <i>Juniperus communis</i>     | 74.34           | shrub     |
| <i>Minuartia obtusiloba</i>   | 77.87           | forb      |
| <i>Poa pratensis</i>          | 80.95           | graminoid |
| <i>Abies grandis</i>          | 83.27           | tree      |
| <i>Osmorhiza depauperata</i>  | 89.40           | forb      |
| <i>Vaccinium membranaceum</i> | 93.71           | shrub     |
| <i>Abies concolor</i>         | 119.11          | tree      |
| <i>Antennaria media</i>       | 179.80          | forb      |
| <i>Paxistima myrsinites</i>   | 289.50          | shrub     |

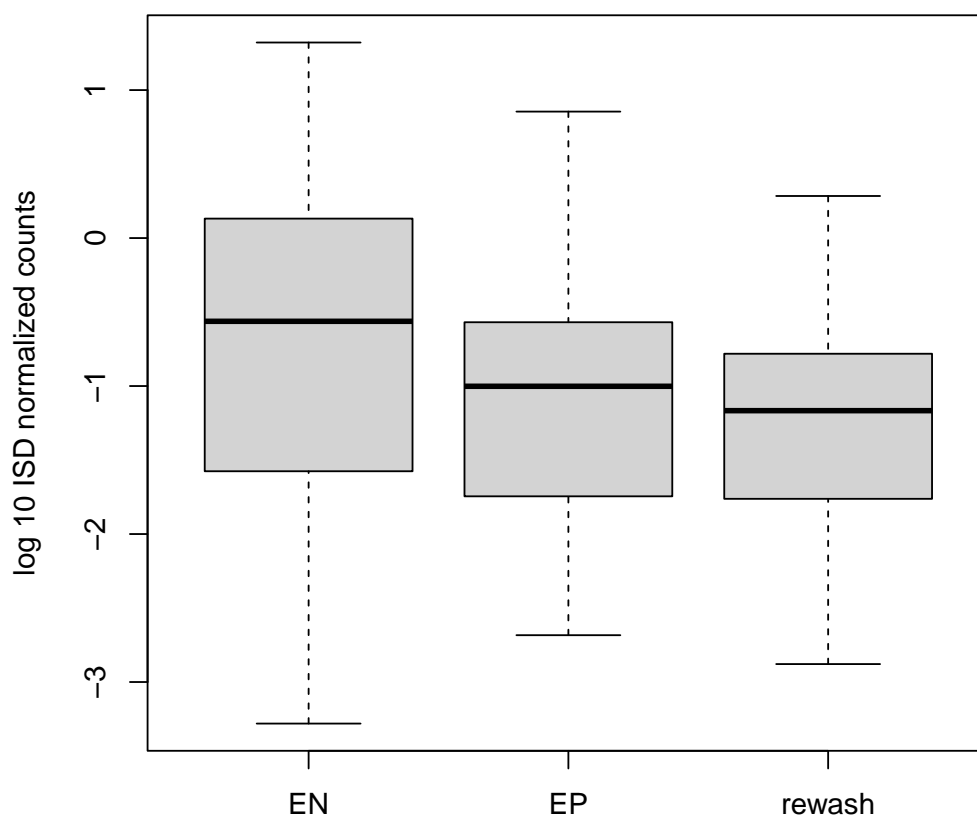

Figure S1: Boxplot showing read abundances from samples that were washed multiple times to determine the efficacy of our epiphyte removal technique. Data were divided by the internal standard to place them on a standard scale. For bacterial data, see Fig. S2

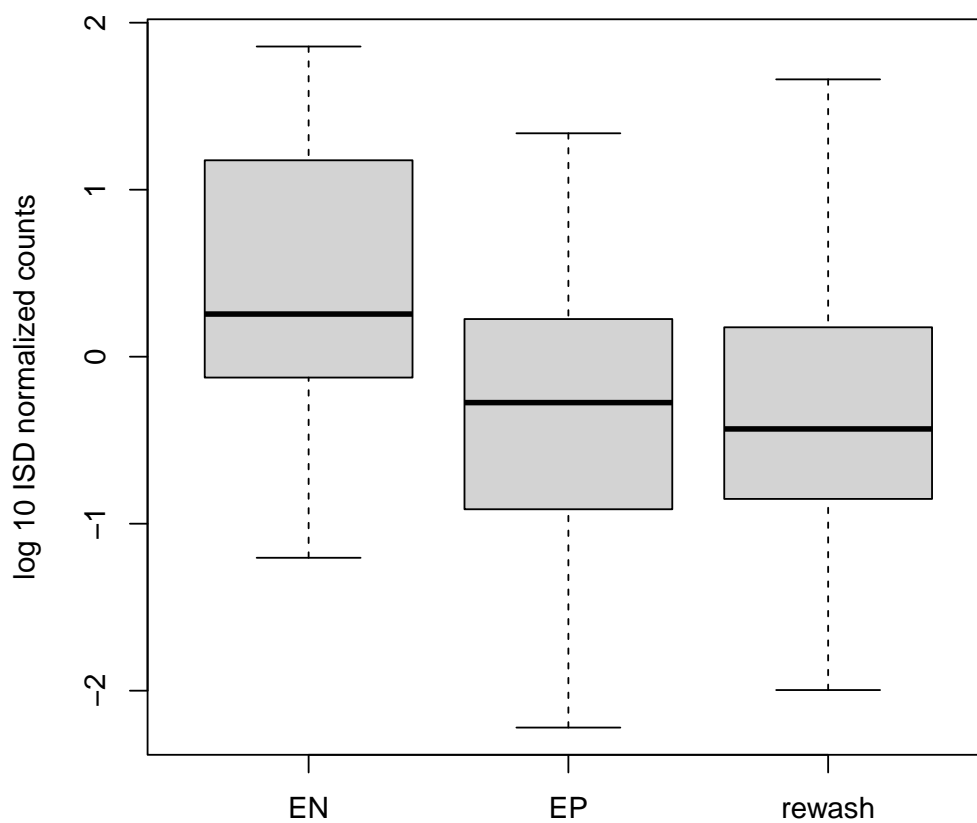

Figure S2: Boxplot showing read abundances from samples that were washed multiple times to determine the efficacy of our epiphyte removal technique. Data were divided by the internal standard to account for compositionality. For fungal data see, Fig. S1

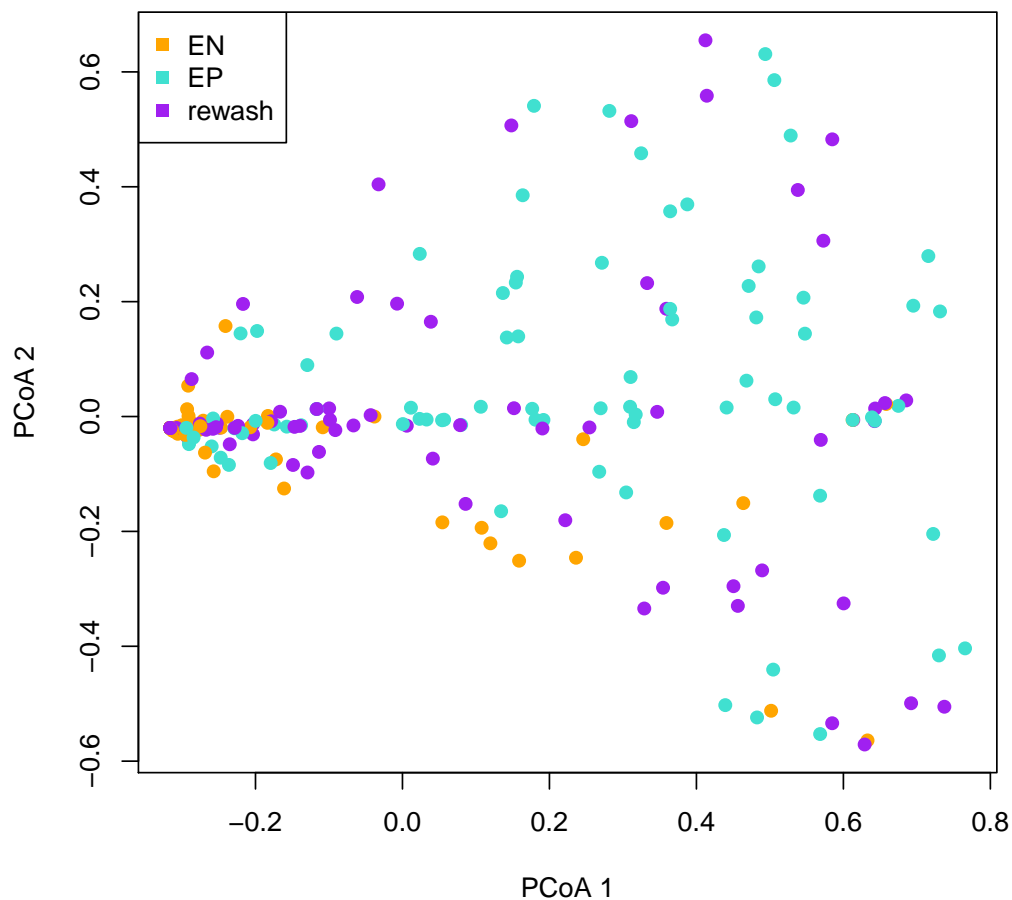

Figure S3: Principal coordinates ordination of samples that were washed multiple times to determine the efficacy of our epiphyte removal technique. Data were Hellinger transformed *bacterial* count data converted to a Euclidean distance matrix. A PERMANOVA by treatment (one of “EP”, “EN”, “rewash”) was significant.



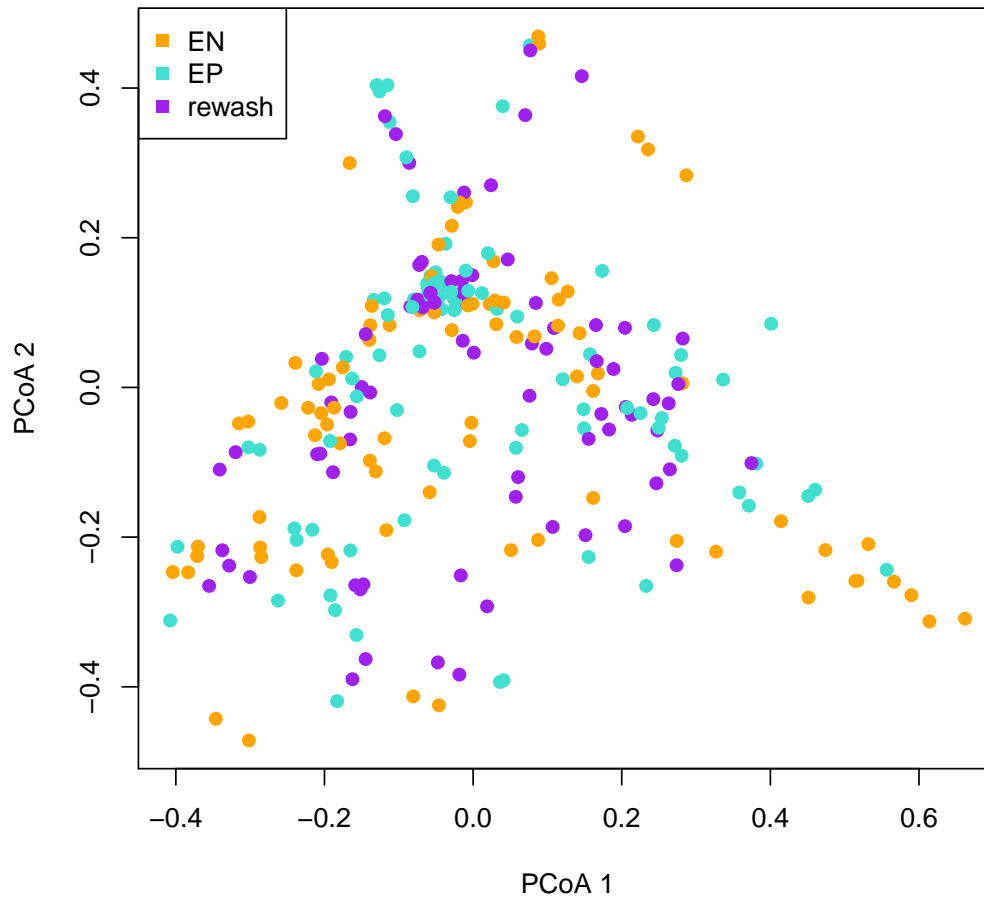

Figure S4: Principal coordinates ordination of samples that were washed multiple times to determine the efficacy of our epiphyte removal technique. Data were Hellinger transformed *fungus* count data converted to a Euclidean distance matrix. A PERMANOVA by treatment (one of “EP”, “EN”, “rewash”) was not significant.

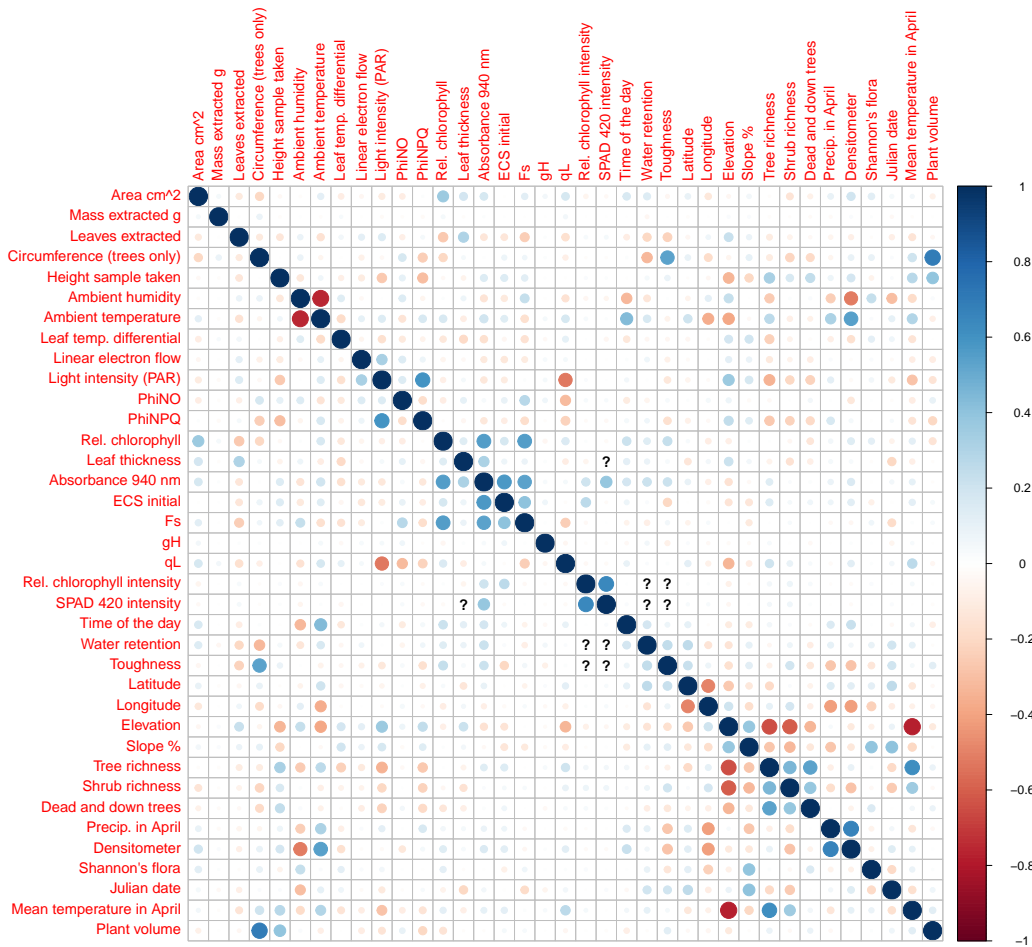

Figure S5: Pearson's pairwise correlations among features used in random forest models of microbial relative abundances. Blue denotes positive correlation and red negative correlation. The strength of association is denoted via shading, as shown in the sidebar. Question marks denote instances where missing data in the features being associated coincided, thus preventing accurate correlation assessment. For a description of features, see Table 1.

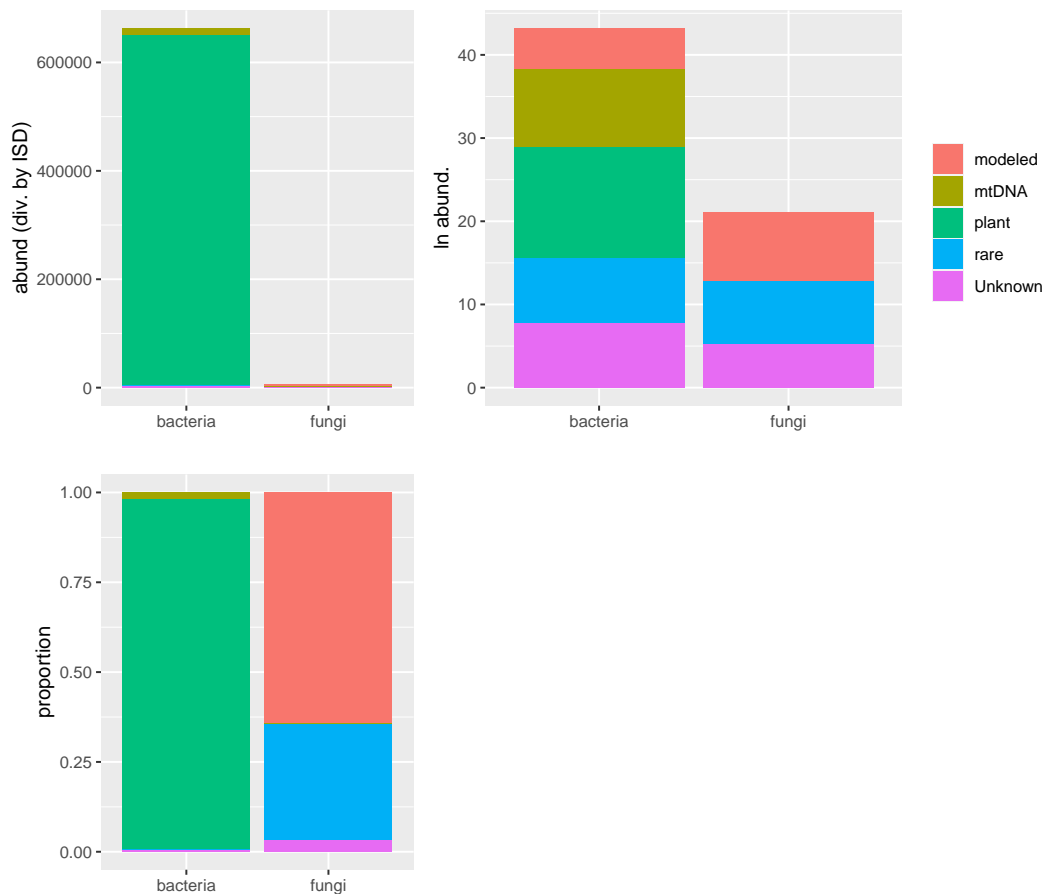

Figure S6: Read count data from various sources (e.g., plant, microbes) shown as abundances (divided by the ISD), logged abundances (natural log), and proportions. “modeled” refers to those taxa that were included in modeling efforts. “rare” refers to those taxa that were not modeled.

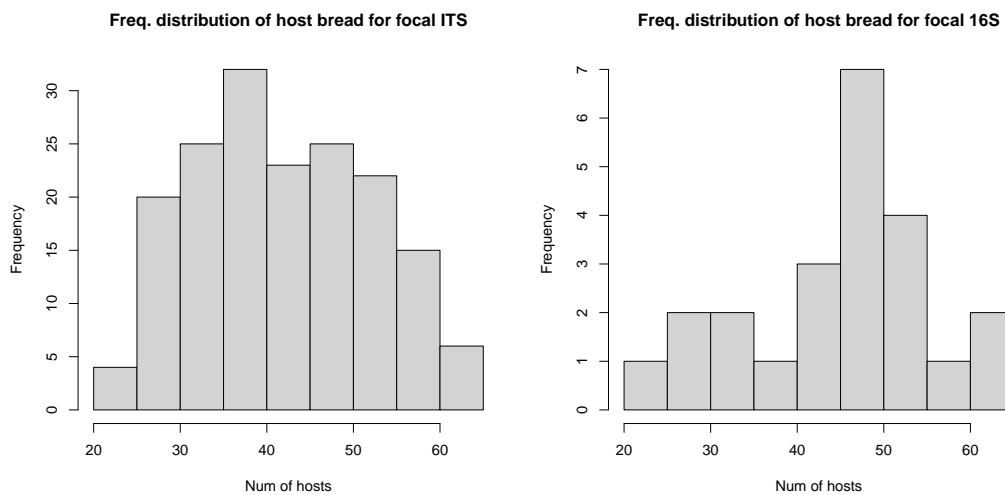

Figure S7: Frequency distribution of host use for fungal (left) and bacterial (right) taxa considered for our random forest analyses. These taxa were the most prevalent, and some of the most abundant, in our dataset.

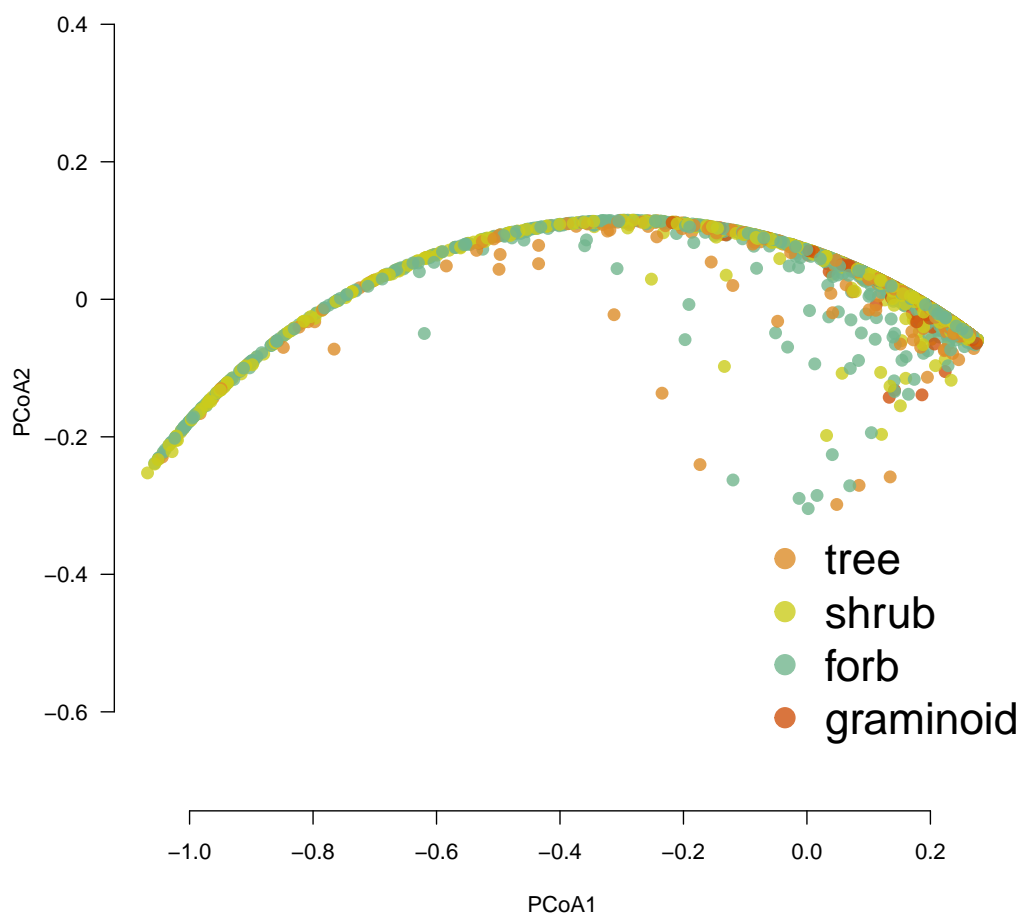

Figure S8: Principal coordinates analysis ordination of 16s (bacterial) data color-coded to reflect samples differing by plant life history. Data were normalized by the internal standard, Hellinger transformed, and converted to a Euclidean distance matrix. A PERMANOVA by treatment had an  $R^2 \approx 0.03$  ( $p = 0.001$ ), but the homogeneity of variances assumption of this test was violated.

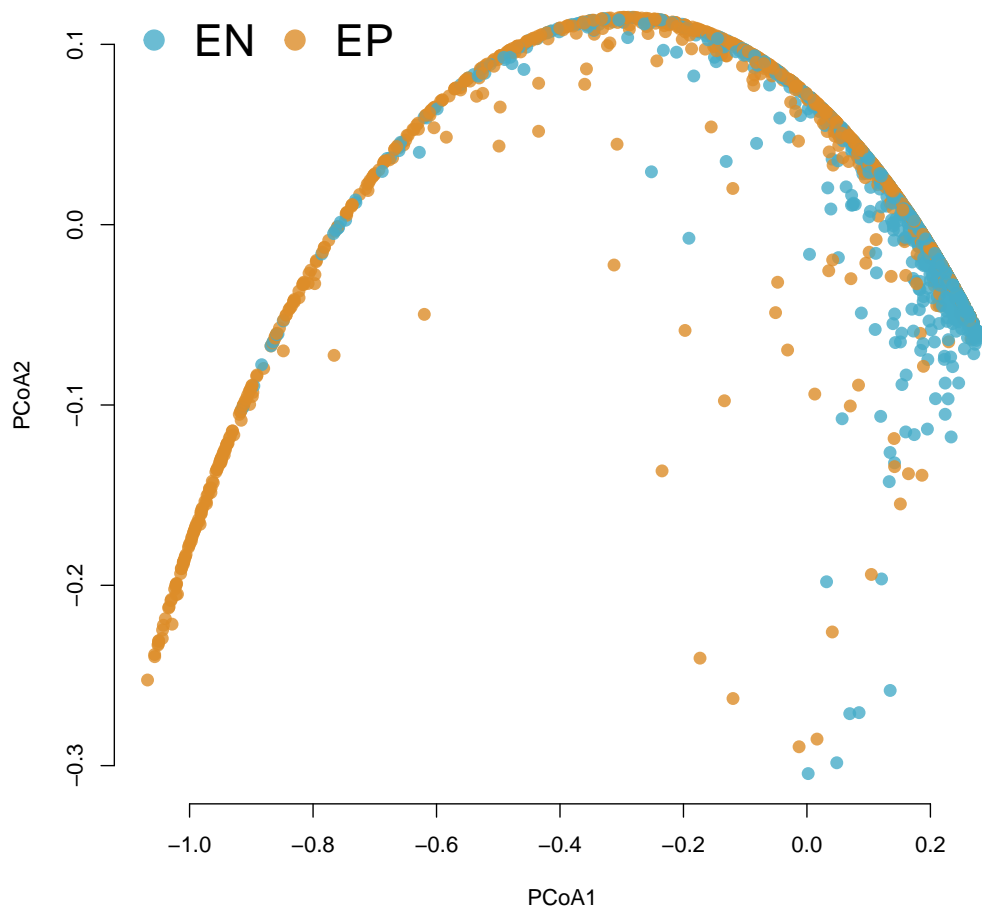

Figure S9: Principal coordinates analysis ordination of 16s (bacterial) data color-coded to reflect samples differing by compartment, either epiphyte (EP) or endophyte (EN). Data were normalized by the internal standard, Hellinger transformed, and converted to a Euclidean distance matrix. A PERMANOVA by treatment had an  $R^2 \approx 0.13$  ( $p = 0.001$ ), but the homogeneity of variances assumption of this test was violated.

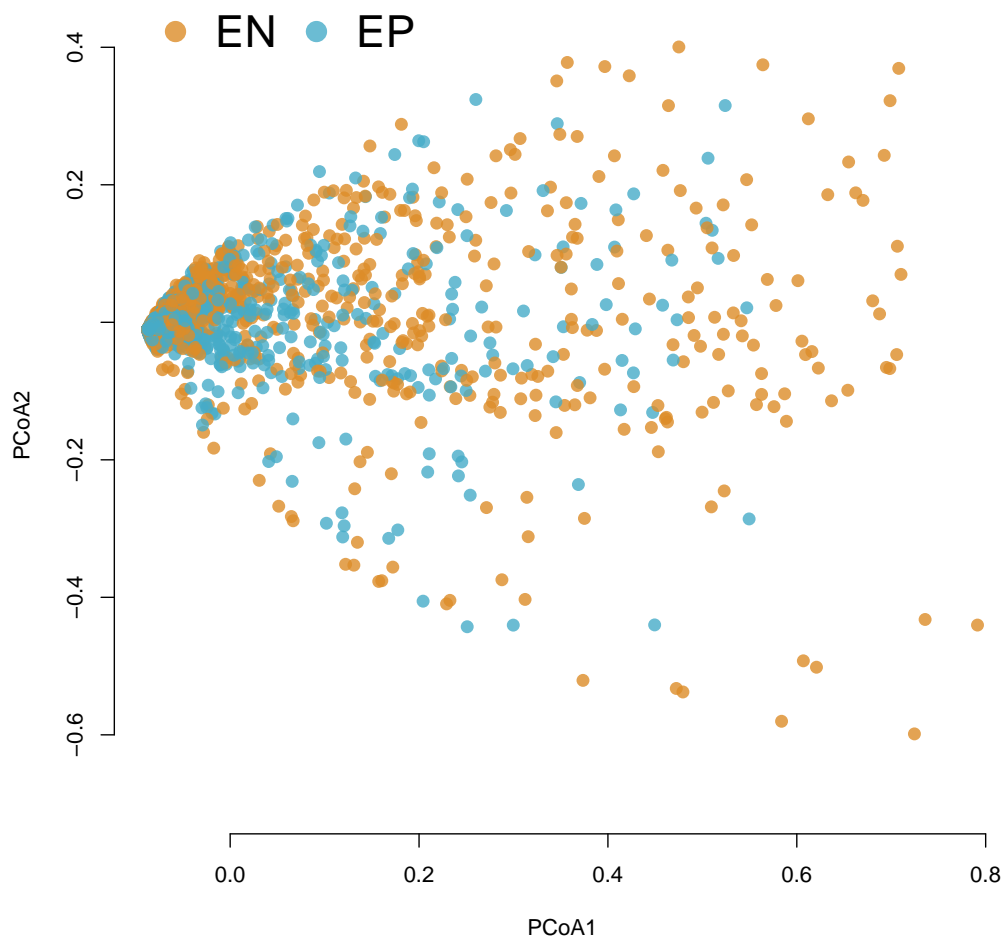

Figure S10: Principal coordinates analysis ordination of ITS (fungal) data color-coded to reflect samples differing by compartment, either epiphyte (EP) or endophyte (EN). Data were normalized by the internal standard, Hellinger transformed, and converted to a Euclidean distance matrix. A PERMANOVA by treatment had an  $R^2 \approx 0.01$  ( $p = 0.001$ ), but the homogeneity of variances assumption of this test was violated.



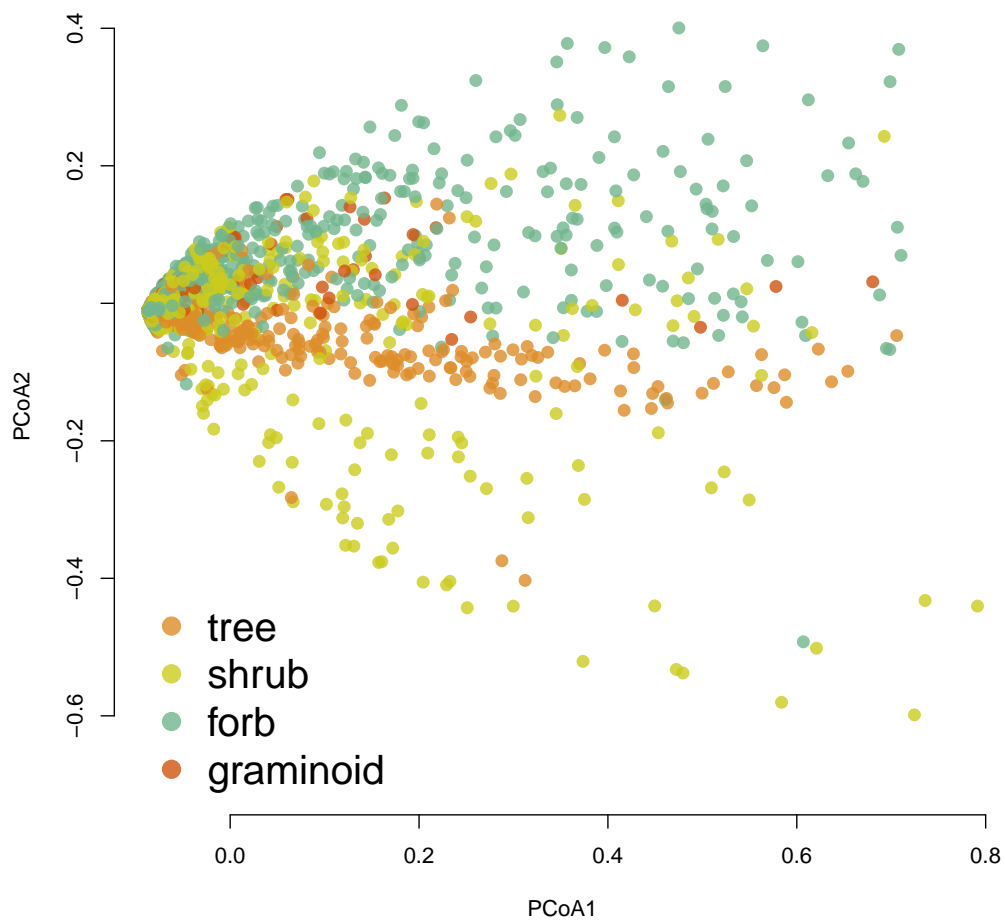

Figure S11: Principal coordinates analysis ordination of ITS (fungal) data color-coded to reflect samples differing by life history. Data were normalized by the internal standard, Hellinger transformed, and converted to a Euclidean distance matrix. A PERMANOVA by treatment had an  $R^2 \approx 0.02$  ( $p = 0.001$ ), but the homogeneity of variances assumption of this test was violated.

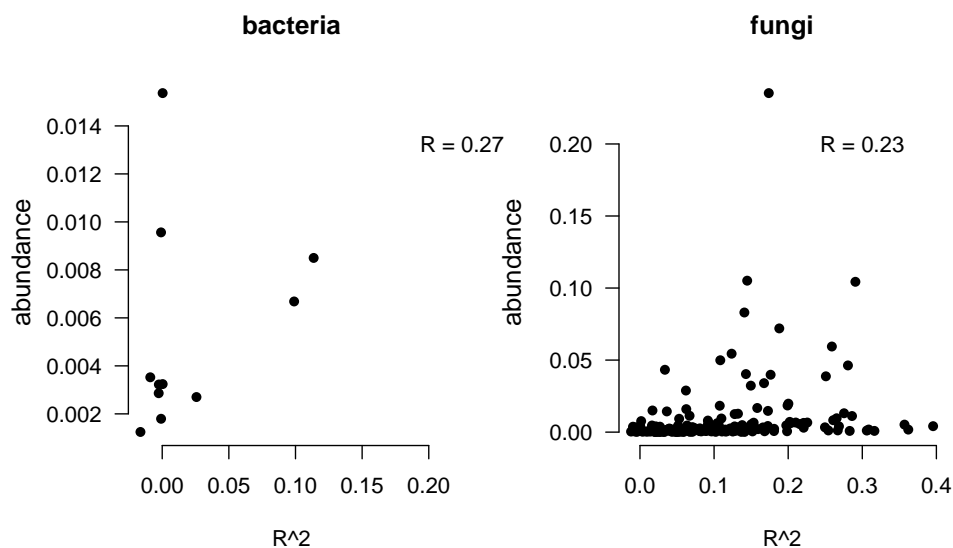

Figure S12: Relationship between  $R^2$  values of random forest models for the relative abundance of each microbial taxon (Hellinger standardized data) and mean relative abundance. This relationship shows if model performance was influenced by taxon relative abundance. Pearson's correlation coefficients are shown. The correlation between fungal abundance and  $R^2$  was significant, but the correlation between bacterial abundance and  $R^2$  was not (sample size differed drastically between these comparisons, thus influencing p values, see main text).

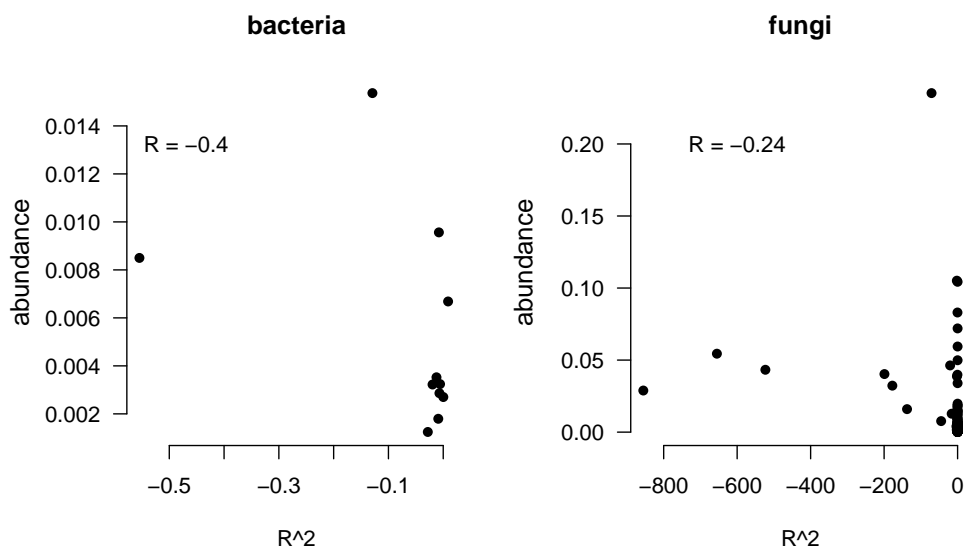

Figure S13: Relationship between  $R^2$  values of random forest models for the absolute abundance of each microbial taxon (abundances normalized by the ISD) and mean absolute abundance. This relationship shows if model performance was influenced by taxon abundance. Pearson's correlation coefficients are shown. The correlation between fungal abundance and  $R^2$  was significant, but the correlation between bacterial abundance and  $R^2$  was not (sample size differed drastically between these comparisons, thus influencing p values, see main text).

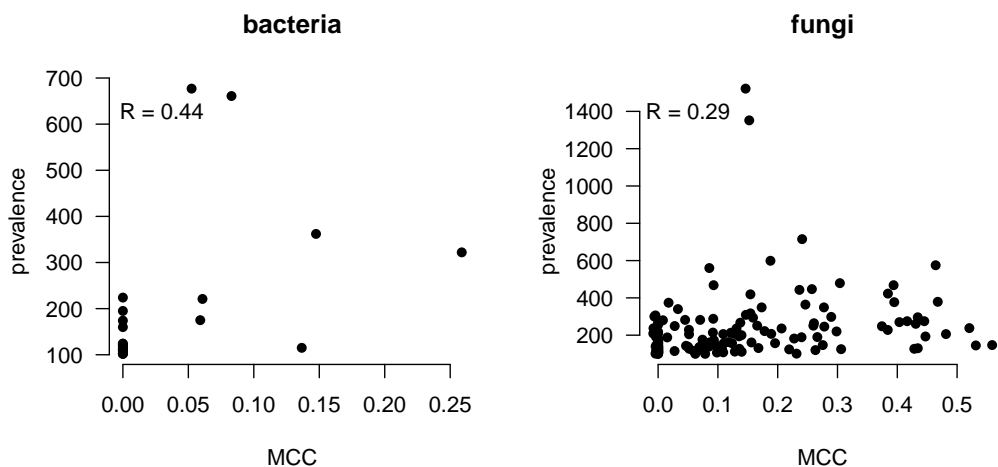

Figure S14: Relationship between Matthew's Correlation Coefficient (MCC) values of random forest models for the occurrence of each microbial taxon and prevalence (how many samples the microbial taxon was observed within). Pearson's correlation coefficients are shown. The correlation between fungal abundance and  $R^2$  was significant ( $p < 0.01$ ), but the correlation between bacterial abundance and  $R^2$  was not ( $p = 0.11$ ; sample size differed drastically between these comparisons, thus influencing p values, see main text).

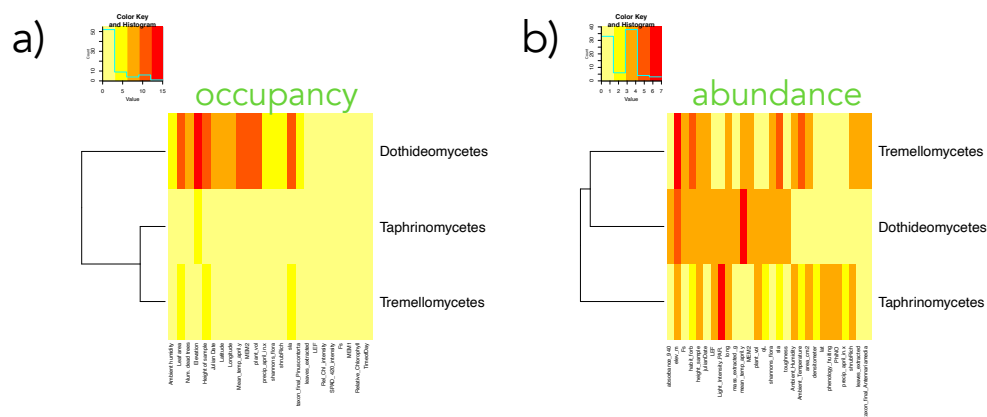

Figure S15: Heatmaps of feature importance for models of fungal occupancy (a) and absolute abundance (b). Heatmaps were not generated for bacteria, because bacterial assemblage variation was generally unpredictable. Features chosen were in the top ten most important for successful models (those models with an  $R^2$  over 1% or an MCC greater than 0.2) and were important for at least 20% of all successful models (thus those features that were important for isolated taxa are not shown here, for the sake of visualization).

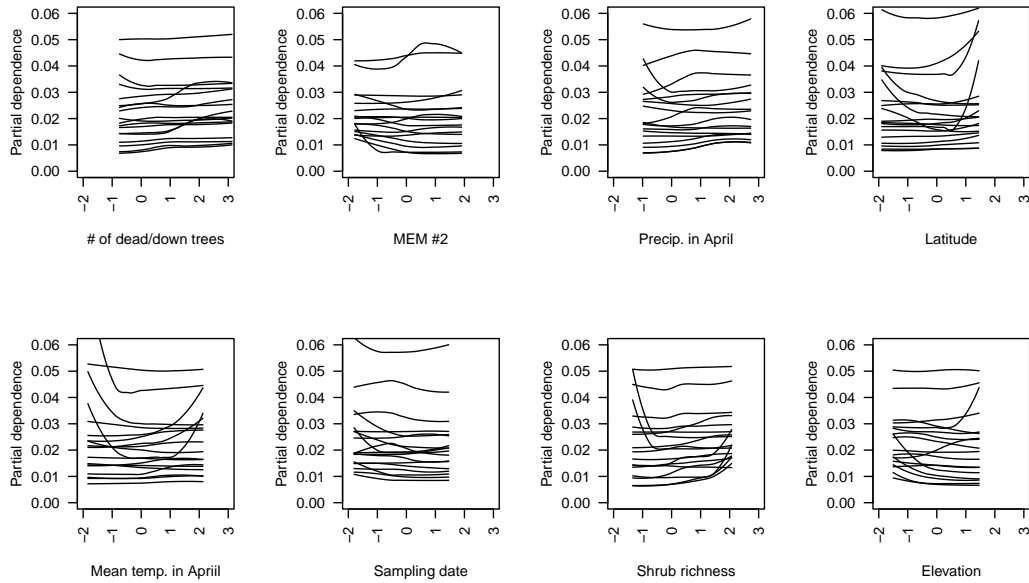

Figure S16: Partial dependence plots showing the modeled relationship between each feature (x axis; z score standardized) and the relative abundance of a fungal taxon (y axis). Each line shows the response curve for a different fungal taxon. Feature-taxon relationships shown are from the best performing models, each of which had an  $R^2 > 0.25$ . Axis dimensions are standardized among plots to aid visual comparison. Because so few models were successful for fungal absolute abundances and bacteria we omit analogous figures for them.

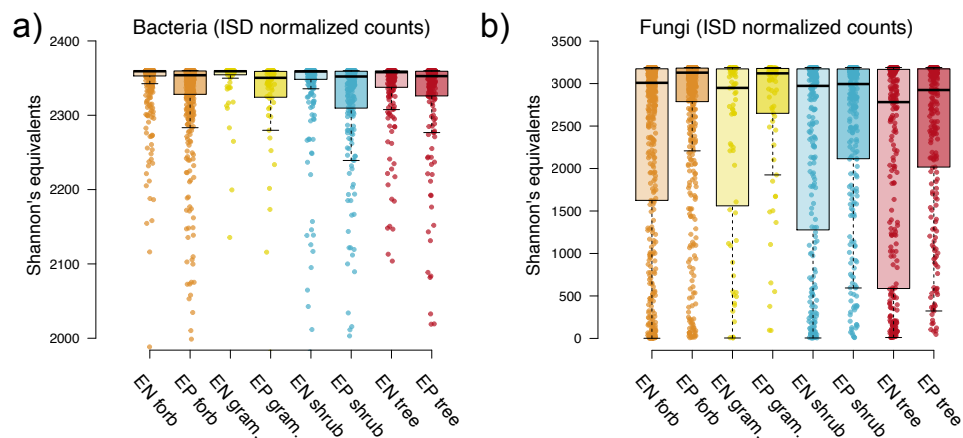

Figure S17: Shannon's diversity of bacterial (a) and fungal (b) assemblages from epiphyte (EP) and endophyte (EN) samples of various plant taxa grouped by growth habit (forb, graminoid, shrub, or tree). Diversity estimates were exponentiated to convert them into species equivalents. Boxplots denote interquartile ranges, with a horizontal bar illustrating the median. Whiskers extend from the 10th to the 90th quantiles of the data. For Tukey's HSD comparisons among groups see Tables S10 and S11.



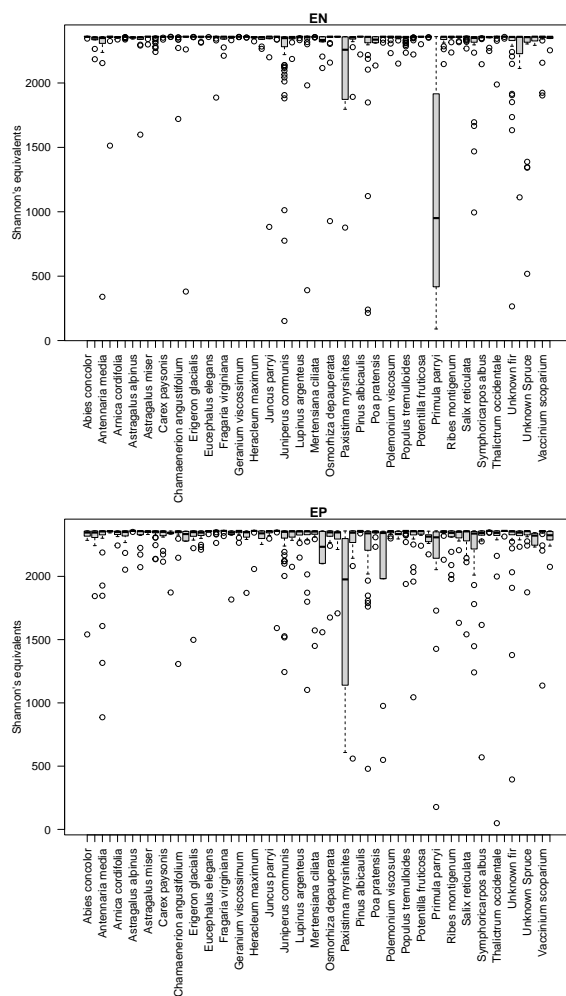

Figure S18: Shannon's diversity of bacterial assemblages by host for epiphyte (EP) and endophyte (EN) samples. Diversity estimates were exponentiated to convert them into species equivalents and were calculated from ISD normalized count data. Boxplots denote interquartile ranges, with a horizontal bar illustrating the median. Whiskers extend from the 10th to the 90th quantiles of the data.

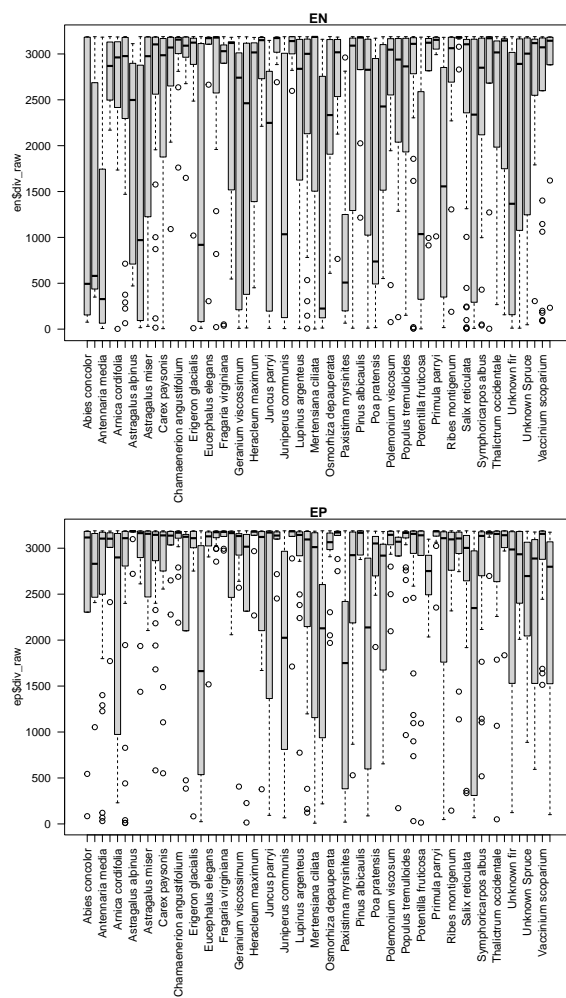

Figure S19: Shannon's diversity of fungal assemblages by host for epiphyte (EP) and endophyte (EN) samples. Diversity estimates were exponentiated to convert them into species equivalents and were calculated from ISD normalized count data. Boxplots denote interquartile ranges, with a horizontal bar illustrating the median. Whiskers extend from the 10th to the 90th quantiles of the data.

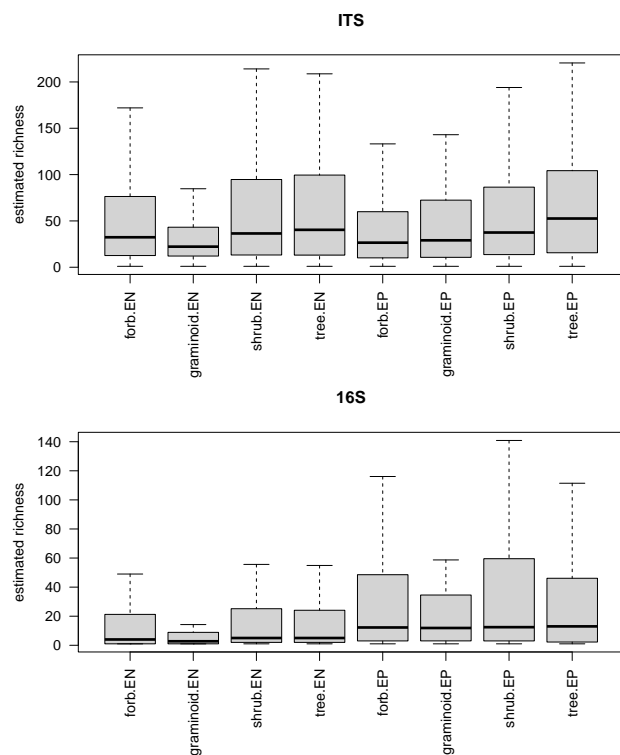

Figure S20: Estimated richness of ITS and 16S OTUs as a function of host compartment and life history. For details of richness estimation see main text. Results from a Tukey's HSD test are shown in Tables S13 and S12.

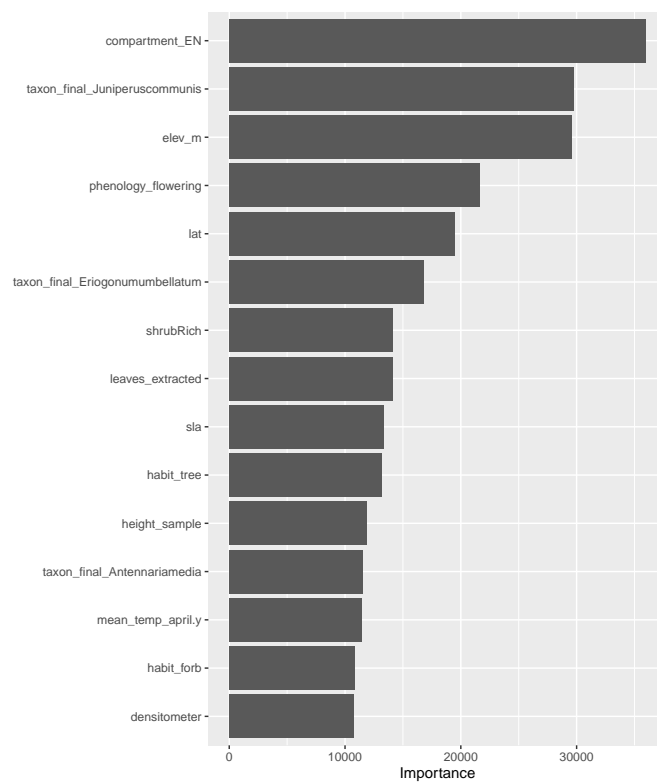

Figure S21: Feature importance plot for a random forest model of fungal Shannon's diversity.

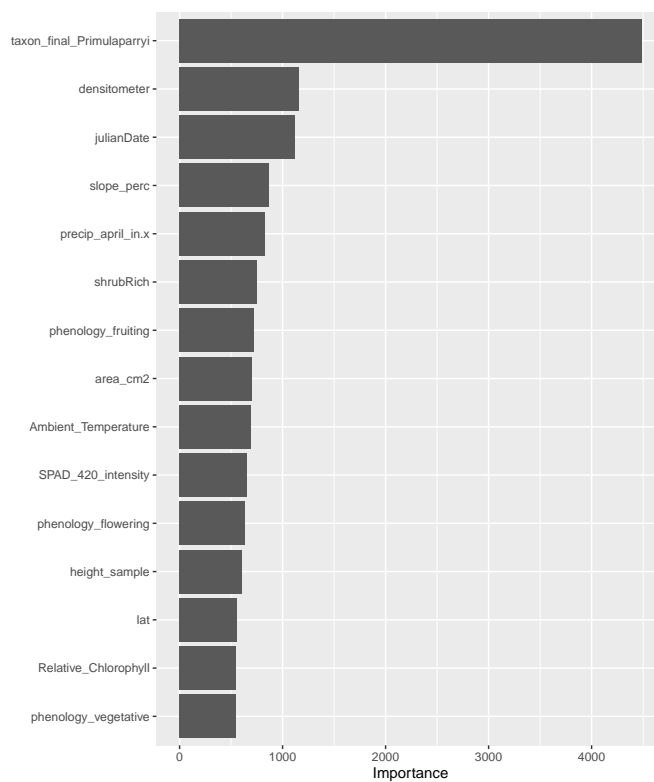

Figure S22: Feature importance plot for a random forest model of bacterial Shannon's diversity.

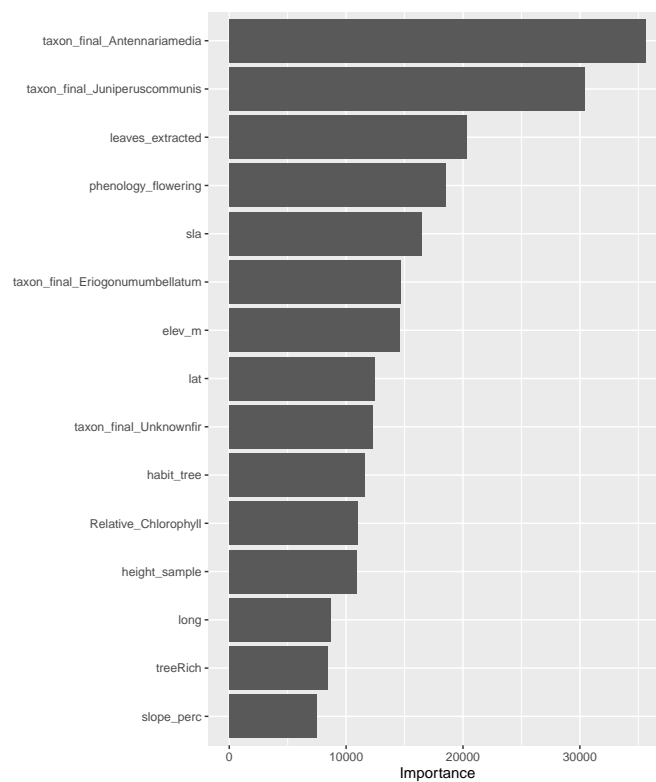

Figure S23: Feature importance plot for a random forest model of fungal endophyte Shannon's diversity.

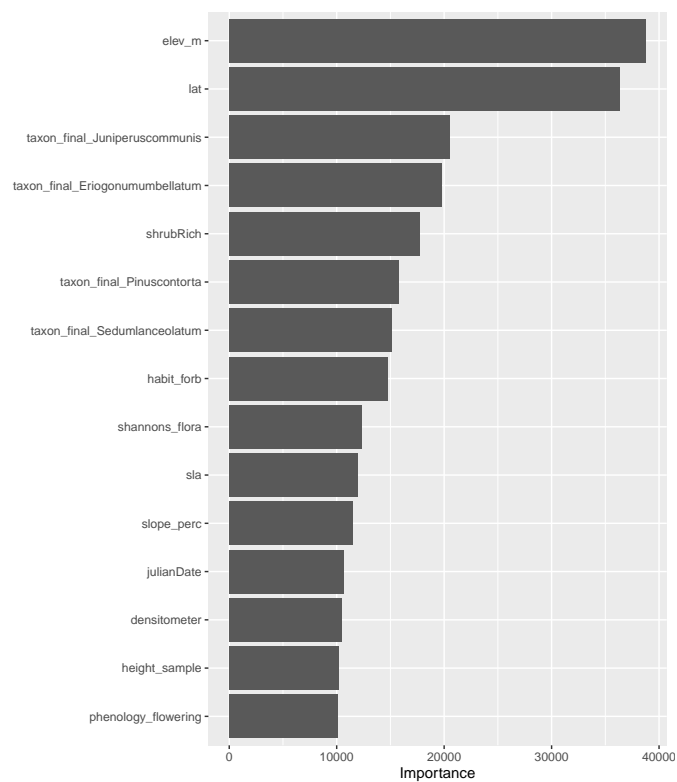

Figure S24: Feature importance plot for a random forest model of fungal epiphyte Shannon's diversity.



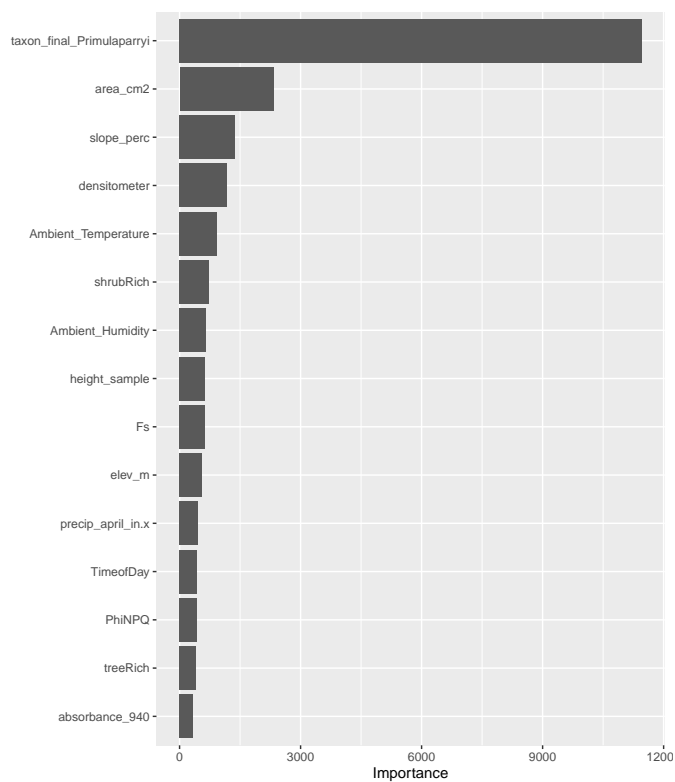

Figure S25: Feature importance plot for a random forest model of bacterial endophyte Shannon's diversity.

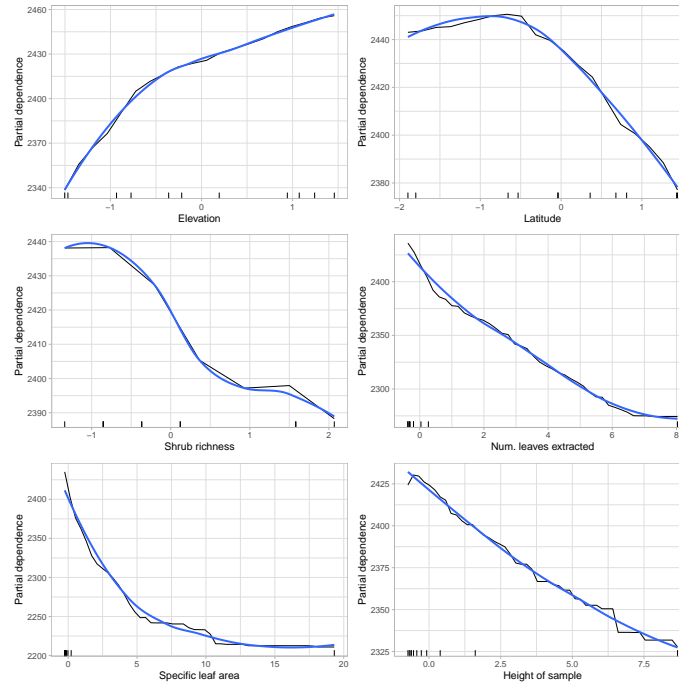

Figure S26: Partial dependence plot (PDP) of the most influential continuous features used by a random forest model of fungal Shannon's diversity. PDPs show the relationship between a feature and the response across both of their ranges.

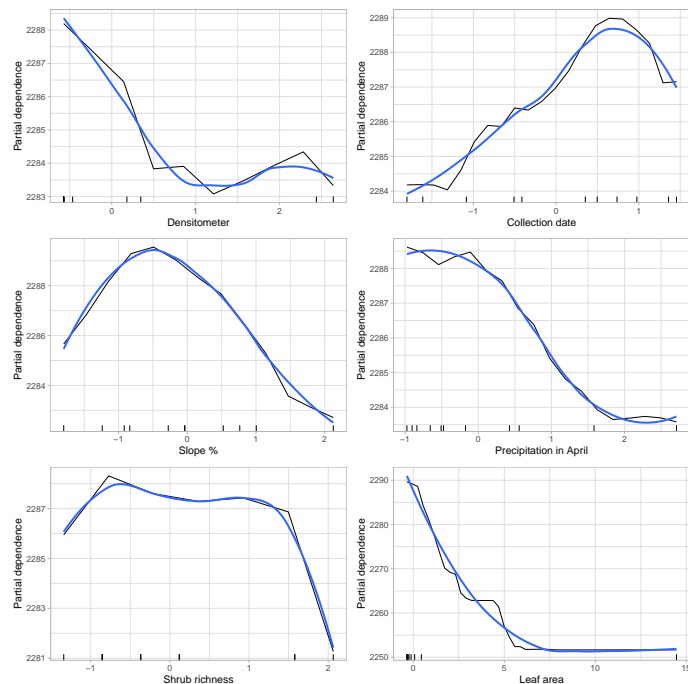

Figure S27: Partial dependence plot (PDP) of the most influential continuous features used by a random forest model of bacterial Shannon's diversity. PDPs show the relationship between a feature and the response across both of their ranges.

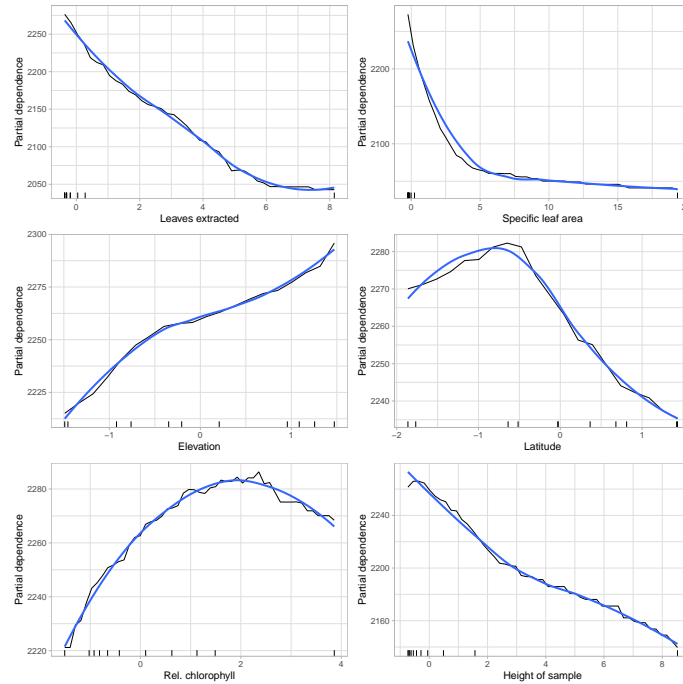

Figure S28: Partial dependence plot (PDP) of the most influential continuous features used by a random forest model of fungal endophyte Shannon's diversity. PDPs show the relationship between a feature and the response across both of their ranges.

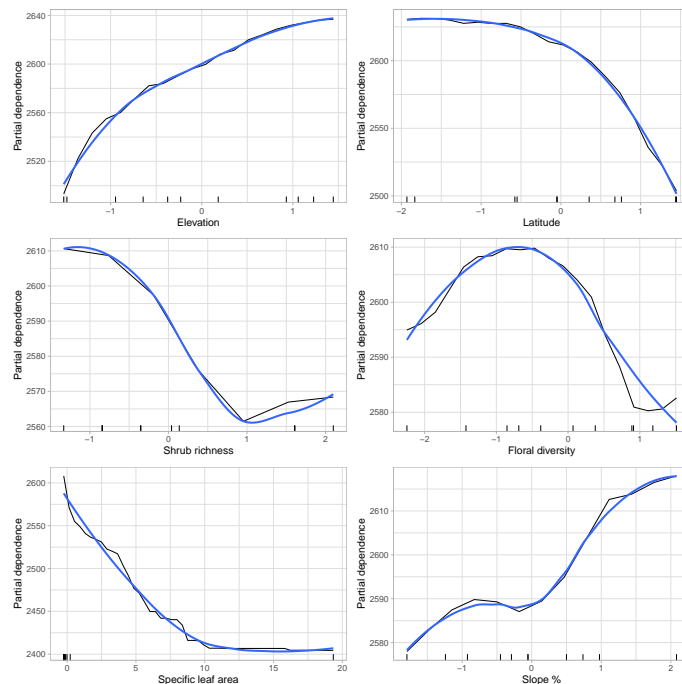

Figure S29: Partial dependence plot (PDP) of the most influential continuous features used by a random forest model of fungal epiphyte Shannon's diversity. PDPs show the relationship between a feature and the response across both of their ranges.

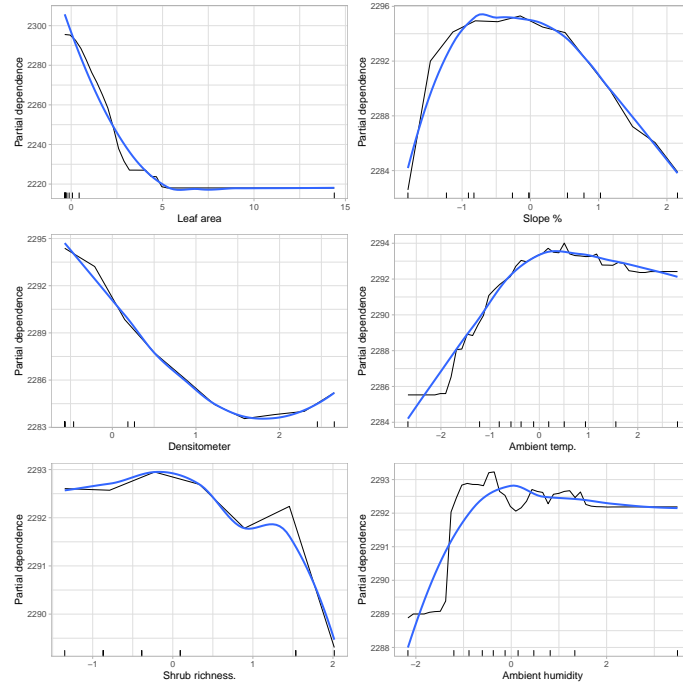

Figure S30: Partial dependence plot (PDP) of the most influential continuous features used by a random forest model of bacterial endophyte Shannon's diversity. PDPs show the relationship between a feature and the response across both of their ranges. A PDP from the model of bacterial epiphyte diversity is not provided because the model had poor predictive performance.

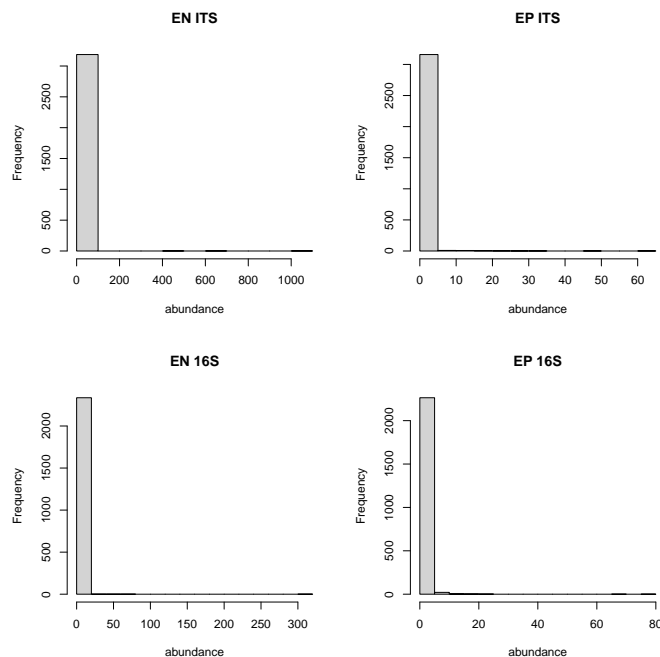

Figure S31: Rank abundance histograms for ISD transformed data. Locus and compartment are shown in each plot. Frequency refers to the number of taxa within a given abundance class. A single random sample was chosen from each sampling location and host, thus some hosts are represented more than once since they occurred at multiple sites.

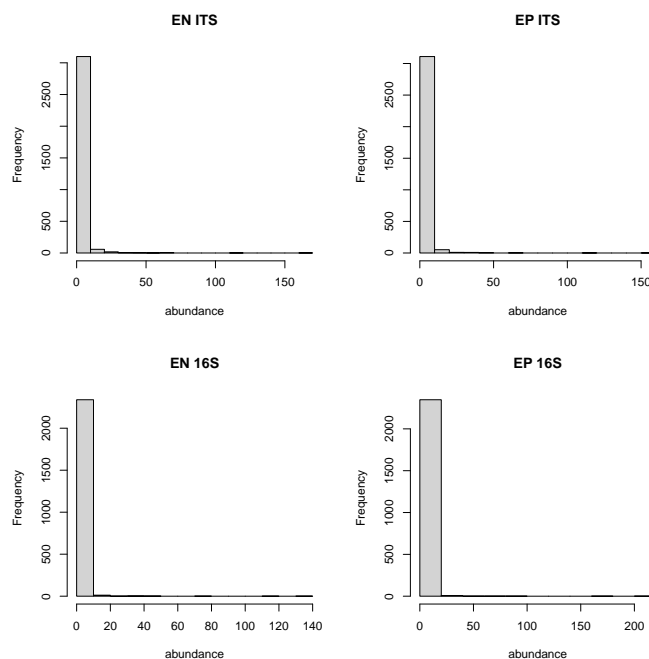

Figure S32: Rank abundance histograms for Hellinger transformed data. Locus and compartment are shown in each plot. Frequency refers to the number of taxa within a given abundance class. A single random sample was chosen from each sampling location and host, thus some hosts are represented more than once since they occurred at multiple sites.
